# Supplementary material for: Relativistic effects in triphenylbismuth and their influence on molecular structure and spectroscopic properties
Source: Royal Society of Chemistry journal article supplement (doi:10.1039/c2cp43471g), 2012-01-01
Supplement: c2cp43471g1.pdf [file c2cp43471g1.pdf]

## Electronic Supplementary Information

### Relativistic Effects in Triphenylbismuth and Their Consequences on Molecular Structure and Spectroscopic Properties

R. J. F. Berger, D. Rettenwander, S. Spirk, C. Wolf, M. Patschke, M. Ertl, U. Monkowius and N. W. Mitzel

#### S1 Gas-phase electron diffraction data details

10 **Table S1** Experimental details for the gas electron diffraction experiment of BiPh<sub>3</sub>. The calibrated electron wavelength was 0.04816 nm for all datasets.

| Data set | $R_g$<br>% | $R_d$<br>% | $K$    | e.s.d  | Corr.<br>Parameter | $s$<br>[nm <sup>-1</sup> ] | $s_{\min}$<br>[nm <sup>-1</sup> ] | $s_{w1}$<br>[nm <sup>-1</sup> ] | $s_{w2}$<br>[nm <sup>-1</sup> ] | $s_{\max}$<br>[nm <sup>-1</sup> ] | $d$<br>[mm] |
|----------|------------|------------|--------|--------|--------------------|----------------------------|-----------------------------------|---------------------------------|---------------------------------|-----------------------------------|-------------|
| 1        | 7.37       | 3.53       | 0.8089 | 0.0074 | 0.4932             | 1.00                       | 30.0                              | 47.0                            | 113.0                           | 126.0                             | 500.0       |
| 2        | 6.56       | 3.07       | 0.8081 | 0.0075 | 0.4879             | 1.00                       | 30.0                              | 49.0                            | 114.0                           | 126.0                             | 500.0       |
| 3        | 10.94      | 8.04       | 0.6882 | 0.0074 | 0.3125             | 2.00                       | 56.0                              | 76.0                            | 258.0                           | 280.0                             | 250.0       |
| 4        | 10.79      | 8.05       | 0.6895 | 0.0079 | 0.2984             | 2.00                       | 58.0                              | 78.0                            | 240.8                           | 280.0                             | 250.0       |

#### S2 Gas-phase electron diffraction molecular scattering intensity curves

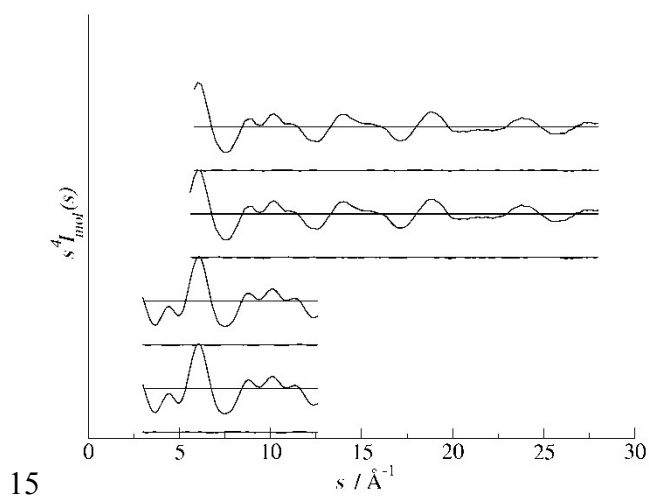

15

20

---

### S3 Refined structure parameters and restraints

| parameter     | short description | restraint(uncertainty) | value(e.s.d.) |
|---------------|-------------------|------------------------|---------------|
| <i>p</i> [1]  | rBiC              | –                      | 2.263(3)      |
| <i>p</i> [2]  | tors              | 43.5(20)               | 43.6(20)      |
| <i>p</i> [3]  | wiC3              | –                      | 31.9(7)       |
| <i>p</i> [4]  | dwBi              | –4.0(10)               | –3.70(96)     |
| <i>p</i> [5]  | rC1C4             | 1.390(14)              | 1.398(10)     |
| <i>p</i> [6]  | rC4C2             | 1.390(14)              | 1.400(10)     |
| <i>p</i> [7]  | rC2C6             | 1.390(14)              | 1.400(11)     |
| <i>p</i> [8]  | rC6C3             | 1.390(14)              | 1.398(11)     |
| <i>p</i> [9]  | rC3C5             | 1.390(14)              | 1.401(09)     |
| <i>p</i> [10] | rC5C1             | 1.390(14)              | 1.392(10)     |
| <i>p</i> [11] | wC1C4C2           | 120.0(10)              | 119.84(87)    |
| <i>p</i> [12] | wC3C5C1           | 120.0(10)              | 119.78(83)    |
| <i>p</i> [13] | wC2C6C3           | 120.0(10)              | 119.16(51)    |
| <i>p</i> [14] | rH5               | 1.070(10)              | 1.065(10)     |
| <i>p</i> [15] | rH1               | 1.070(10)              | 1.065(09)     |
| <i>p</i> [16] | rH4               | 1.070(10)              | 1.065(09)     |
| <i>p</i> [17] | rH2               | 1.070(10)              | 1.064(09)     |
| <i>p</i> [18] | rH6               | 1.070(10)              | 1.067(09)     |
| <i>p</i> [19] | dwH5              | 3.6(10)                | 3.7(10)       |
| <i>p</i> [20] | dwH1              | 1.4(20)                | 1.3(20)       |
| <i>p</i> [21] | dwH4              | –1.6(20)               | –1.4(19)      |
| <i>p</i> [22] | dwH2              | 1.6(20)                | 1.6(20)       |
| <i>p</i> [23] | dwH6              | –0.1(20)               | –0.1(20)      |

5

10

15

20

### S4 Independently refined amplitudes of vibration

**Table 4** Independently refined vibrational amplitudes from the structure refinement of BiPh3

| amplitude | description   | $r_{h,1}$  | $u$       | orig. $u$ | area  | $k$    |
|-----------|---------------|------------|-----------|-----------|-------|--------|
| $u_4$     | Bi(1)···C(5)  | 4.493(16)  | 0.125(15) | 0.101     | 0.4   | -0.011 |
| $u_{15}$  | Bi(1)···C(16) | 4.518(13)  | 0.091(9)  | 0.091     | 0.1   | -0.018 |
| $u_{23}$  | Bi(1)-C(24)   | 2.264(3)   | 0.071(4)  | 0.068     | 100.0 | 0.003  |
| $u_{28}$  | Bi(1)···C(29) | 5.040(7)   | 0.105(8)  | 0.090     | 44.9  | -0.025 |
| $u_{29}$  | Bi(1)···H(30) | 6.091(11)  | 0.119(10) | 0.116     | 6.2   | -0.041 |
| $u_{34}$  | C(2)-C(3)     | 1.398(10)  | 0.037(1)  | 0.049     | 11.7  | 0.001  |
| $u_{35}$  | C(2)···H(4)   | 2.115(16)  | 0.082(5)  | 0.101     | 1.3   | -0.013 |
| $u_{36}$  | C(2)···C(5)   | 2.423(13)  | 0.058(3)  | 0.064     | 6.8   | 0.004  |
| $u_{350}$ | C(13)···C(33) | 3.898(32)  | 0.461(49) | 0.469     | 4.2   | -0.036 |
| $u_{361}$ | C(14)···C(24) | 3.449(36)  | 0.327(17) | 0.280     | 4.7   | 0.129  |
| $u_{363}$ | C(14)···H(26) | 3.997(91)  | 0.965(89) | 0.965     | 0.7   | 0.055  |
| $u_{364}$ | C(14)···C(27) | 4.898(64)  | 0.586(49) | 0.585     | 3.3   | 0.158  |
| $u_{380}$ | H(15)···C(24) | 2.893(43)  | 0.543(24) | 0.454     | 0.9   | 0.298  |
| $u_{382}$ | H(15)···H(26) | 3.338(118) | 1.159(87) | 1.100     | 0.1   | 0.147  |
| $u_{385}$ | H(15)···C(29) | 4.430(56)  | 0.679(68) | 0.677     | 0.6   | 0.412  |
| $u_{389}$ | H(15)···C(33) | 2.954(87)  | 1.031(30) | 0.825     | 0.9   | 0.241  |
| $u_{398}$ | C(16)···C(24) | 4.780(38)  | 0.288(29) | 0.289     | 3.4   | 0.087  |
| $u_{407}$ | C(16)···C(33) | 4.986(60)  | 0.727(79) | 0.729     | 3.3   | 0.051  |
| $u_{469}$ | C(20)···C(33) | 6.048(32)  | 0.629(59) | 0.628     | 2.7   | -0.141 |
| $u_{485}$ | C(22)···C(24) | 4.571(22)  | 0.176(16) | 0.172     | 3.6   | -0.095 |
| $u_{527}$ | H(26)···H(28) | 2.402(25)  | 0.164(20) | 0.167     | 0.2   | -0.002 |
| $u_{556}$ | C(31)-H(32)   | 1.061(9)   | 0.088(5)  | 0.077     | 2.6   | 0.004  |

<sup>a</sup> Footnote text.

5

## S5 Complete Table of amplitude refinement

| Amplitude   | Distance (ra) | e.s.d. | $u$ -Value | e.s.d. | Mult. $k$ -Value | Area | Orig. $u$ -Value |      |        |
|-------------|---------------|--------|------------|--------|------------------|------|------------------|------|--------|
| $u[458]$    | C(20)-C(22)   | 1.4007 | 0.0106     | 0.0354 | Tied to $u[34]$  | 1.00 | 0.0014           | 11.7 | 0.0465 |
| $u[557]$    | C(31)-C(33)   | 1.4007 | 0.0106     | 0.0355 | Tied to $u[34]$  | 1.00 | 0.0014           | 11.7 | 0.0466 |
| 10 $u[67]$  | C(3)-C(5)     | 1.4007 | 0.0106     | 0.0355 | Tied to $u[34]$  | 1.00 | 0.0014           | 11.7 | 0.0466 |
| $u[238]$    | C(9)-C(11)    | 1.4013 | 0.0096     | 0.0355 | Tied to $u[34]$  | 1.00 | 0.0014           | 11.7 | 0.0466 |
| $u[518]$    | C(25)-C(27)   | 1.4013 | 0.0096     | 0.0356 | Tied to $u[34]$  | 1.00 | 0.0014           | 11.7 | 0.0466 |
| $u[353]$    | C(14)-C(16)   | 1.4013 | 0.0096     | 0.0357 | Tied to $u[34]$  | 1.00 | 0.0014           | 11.7 | 0.0467 |
| 15 $u[128]$ | C(5)-C(7)     | 1.4004 | 0.0113     | 0.0366 | Tied to $u[34]$  | 1.00 | 0.0013           | 11.7 | 0.0480 |
| $u[535]$    | C(27)-C(29)   | 1.3986 | 0.0113     | 0.0368 | Tied to $u[34]$  | 1.00 | 0.0013           | 11.7 | 0.0483 |
| $u[185]$    | C(7)-C(9)     | 1.3985 | 0.0113     | 0.0368 | Tied to $u[34]$  | 1.00 | 0.0012           | 11.7 | 0.0483 |
| $u[427]$    | C(18)-C(20)   | 1.4004 | 0.0113     | 0.0369 | Tied to $u[34]$  | 1.00 | 0.0013           | 11.7 | 0.0482 |
| $u[392]$    | C(16)-C(18)   | 1.3986 | 0.0113     | 0.0369 | Tied to $u[34]$  | 1.00 | 0.0013           | 11.7 | 0.0484 |
| $u[548]$    | C(29)-C(31)   | 1.4004 | 0.0113     | 0.0369 | Tied to $u[34]$  | 1.00 | 0.0013           | 11.7 | 0.0483 |
| 20 $u[42]$  | C(2)-C(11)    | 1.3925 | 0.0099     | 0.0371 | Tied to $u[34]$  | 1.00 | 0.0011           | 11.8 | 0.0487 |
| $u[507]$    | C(24)-C(25)   | 1.3925 | 0.0099     | 0.0373 | Tied to $u[34]$  | 1.00 | 0.0011           | 11.8 | 0.0489 |
| $u[331]$    | C(13)-C(14)   | 1.3925 | 0.0099     | 0.0373 | Tied to $u[34]$  | 1.00 | 0.0011           | 11.8 | 0.0490 |
| $u[34]$     | C(2)-C(3)     | 1.3979 | 0.0103     | 0.0374 | 0.0012           | 1.00 | 0.0012           | 11.7 | 0.0491 |
| 25 $u[515]$ | C(24)-C(33)   | 1.3977 | 0.0103     | 0.0375 | Tied to $u[34]$  | 1.00 | 0.0011           | 11.7 | 0.0492 |
| $u[339]$    | C(13)-C(22)   | 1.3977 | 0.0103     | 0.0376 | Tied to $u[34]$  | 1.00 | 0.0011           | 11.7 | 0.0493 |
| $u[537]$    | C(27)···C(31) | 2.4001 | 0.0120     | 0.0552 | Tied to $u[36]$  | 1.00 | -0.0117          | 6.8  | 0.0608 |
| $u[394]$    | C(16)···C(20) | 2.4026 | 0.0120     | 0.0552 | Tied to $u[36]$  | 1.00 | -0.0092          | 6.8  | 0.0608 |
| $u[130]$    | C(5)···C(9)   | 2.3983 | 0.0120     | 0.0552 | Tied to $u[36]$  | 1.00 | -0.0135          | 6.8  | 0.0609 |
| $u[69]$     | C(3)···C(7)   | 2.4311 | 0.0120     | 0.0556 | Tied to $u[36]$  | 1.00 | 0.0020           | 6.7  | 0.0613 |
| 30 $u[359]$ | C(14)···C(22) | 2.4091 | 0.0097     | 0.0558 | Tied to $u[36]$  | 1.00 | -0.0079          | 6.8  | 0.0615 |
| $u[524]$    | C(25)···C(33) | 2.4066 | 0.0097     | 0.0559 | Tied to $u[36]$  | 1.00 | -0.0104          | 6.8  | 0.0616 |
| $u[429]$    | C(18)···C(22) | 2.4304 | 0.0120     | 0.0559 | Tied to $u[36]$  | 1.00 | 0.0013           | 6.7  | 0.0616 |
| $u[73]$     | C(3)···C(11)  | 2.4052 | 0.0097     | 0.0559 | Tied to $u[36]$  | 1.00 | -0.0118          | 6.8  | 0.0616 |
| 35 $u[550]$ | C(29)···C(33) | 2.4313 | 0.0120     | 0.0561 | Tied to $u[36]$  | 1.00 | 0.0022           | 6.7  | 0.0618 |
| $u[520]$    | C(25)···C(29) | 2.4337 | 0.0121     | 0.0564 | Tied to $u[36]$  | 1.00 | 0.0034           | 6.7  | 0.0622 |

|    |        |               |        |        |        |                |      |         |       |        |
|----|--------|---------------|--------|--------|--------|----------------|------|---------|-------|--------|
|    | u[355] | C(14)...C(18) | 2.4318 | 0.0121 | 0.0564 | Tied to u[36]  | 1.00 | 0.0015  | 6.7   | 0.0622 |
|    | u[187] | C(7)...C(11)  | 2.4354 | 0.0121 | 0.0565 | Tied to u[36]  | 1.00 | 0.0051  | 6.7   | 0.0623 |
|    | u[40]  | C(2)...C(9)   | 2.4156 | 0.0118 | 0.0566 | Tied to u[36]  | 1.00 | 0.0006  | 6.8   | 0.0624 |
|    | u[333] | C(13)...C(16) | 2.4149 | 0.0118 | 0.0570 | Tied to u[36]  | 1.00 | -0.0001 | 6.8   | 0.0628 |
| 5  | u[509] | C(24)...C(27) | 2.4156 | 0.0118 | 0.0571 | Tied to u[36]  | 1.00 | 0.0007  | 6.8   | 0.0629 |
|    | u[337] | C(13)...C(20) | 2.4198 | 0.0134 | 0.0574 | Tied to u[36]  | 1.00 | 0.0001  | 6.8   | 0.0633 |
|    | u[513] | C(24)...C(31) | 2.4216 | 0.0134 | 0.0575 | Tied to u[36]  | 1.00 | 0.0019  | 6.8   | 0.0634 |
|    | u[36]  | C(2)...C(5)   | 2.4234 | 0.0134 | 0.0576 | 0.0026         | 1.00 | 0.0037  | 6.8   | 0.0635 |
|    | u[1]   | Bi(1)-C(2)    | 2.2637 | 0.0031 | 0.0709 | Tied to u[23]  | 1.00 | 0.0029  | 100.0 | 0.0680 |
| 10 | u[23]  | Bi(1)-C(24)   | 2.2637 | 0.0031 | 0.0710 | 0.0039         | 1.00 | 0.0029  | 100.0 | 0.0681 |
|    | u[12]  | Bi(1)-C(13)   | 2.2637 | 0.0031 | 0.0710 | Tied to u[23]  | 1.00 | 0.0029  | 100.0 | 0.0681 |
|    | u[35]  | C(2)...H(4)   | 2.1152 | 0.0159 | 0.0819 | 0.0048         | 1.00 | -0.0128 | 1.3   | 0.1014 |
|    | u[442] | H(19)...C(20) | 2.1451 | 0.0166 | 0.0821 | Tied to u[35]  | 1.00 | 0.0000  | 1.3   | 0.1016 |
|    | u[516] | C(24)...H(34) | 2.1166 | 0.0159 | 0.0822 | Tied to u[35]  | 1.00 | -0.0114 | 1.3   | 0.1017 |
| 15 | u[129] | C(5)...H(8)   | 2.1461 | 0.0166 | 0.0822 | Tied to u[35]  | 1.00 | 0.0010  | 1.3   | 0.1017 |
|    | u[340] | C(13)...H(23) | 2.1189 | 0.0159 | 0.0822 | Tied to u[35]  | 1.00 | -0.0091 | 1.3   | 0.1017 |
|    | u[552] | H(30)...C(31) | 2.1461 | 0.0166 | 0.0823 | Tied to u[35]  | 1.00 | 0.0010  | 1.3   | 0.1019 |
|    | u[332] | C(13)...H(15) | 2.1426 | 0.0143 | 0.0824 | Tied to u[35]  | 1.00 | -0.0088 | 1.3   | 0.1020 |
|    | u[541] | H(28)...C(29) | 2.1328 | 0.0163 | 0.0824 | Tied to u[35]  | 1.00 | -0.0119 | 1.3   | 0.1020 |
| 20 | u[186] | C(7)...H(10)  | 2.1312 | 0.0163 | 0.0824 | Tied to u[35]  | 1.00 | -0.0135 | 1.3   | 0.1020 |
|    | u[43]  | C(2)...H(12)  | 2.1397 | 0.0143 | 0.0825 | Tied to u[35]  | 1.00 | -0.0117 | 1.3   | 0.1021 |
|    | u[409] | H(17)...C(18) | 2.1350 | 0.0163 | 0.0825 | Tied to u[35]  | 1.00 | -0.0097 | 1.3   | 0.1021 |
|    | u[508] | C(24)...H(26) | 2.1406 | 0.0143 | 0.0825 | Tied to u[35]  | 1.00 | -0.0108 | 1.3   | 0.1021 |
|    | u[393] | C(16)...H(19) | 2.1425 | 0.0166 | 0.0827 | Tied to u[35]  | 1.00 | 0.0000  | 1.3   | 0.1024 |
| 25 | u[211] | H(8)...C(9)   | 2.1458 | 0.0166 | 0.0827 | Tied to u[35]  | 1.00 | 0.0033  | 1.3   | 0.1024 |
|    | u[536] | C(27)...H(30) | 2.1443 | 0.0166 | 0.0827 | Tied to u[35]  | 1.00 | 0.0018  | 1.3   | 0.1024 |
|    | u[38]  | C(2)...C(7)   | 2.7952 | 0.0075 | 0.0828 | Tied to u[380] | 1.00 | -0.0071 | 5.9   | 0.0693 |
|    | u[428] | C(18)...H(21) | 2.1335 | 0.0181 | 0.0829 | Tied to u[35]  | 1.00 | -0.0100 | 1.3   | 0.1026 |
|    | u[549] | C(29)...H(32) | 2.1315 | 0.0181 | 0.0829 | Tied to u[35]  | 1.00 | -0.0120 | 1.3   | 0.1026 |
| 30 | u[511] | C(24)...C(29) | 2.7948 | 0.0075 | 0.0829 | Tied to u[380] | 1.00 | -0.0074 | 5.9   | 0.0694 |
|    | u[335] | C(13)...C(18) | 2.7953 | 0.0075 | 0.0829 | Tied to u[380] | 1.00 | -0.0069 | 5.9   | 0.0694 |
|    | u[156] | H(6)...C(7)   | 2.1302 | 0.0181 | 0.0831 | Tied to u[35]  | 1.00 | -0.0133 | 1.3   | 0.1028 |
|    | u[372] | H(15)...C(16) | 2.1203 | 0.0142 | 0.0832 | Tied to u[35]  | 1.00 | -0.0002 | 1.3   | 0.1029 |
|    | u[526] | H(26)...C(27) | 2.1218 | 0.0142 | 0.0833 | Tied to u[35]  | 1.00 | 0.0013  | 1.3   | 0.1031 |
| 35 | u[239] | C(9)...H(12)  | 2.1230 | 0.0142 | 0.0833 | Tied to u[35]  | 1.00 | 0.0025  | 1.3   | 0.1031 |
|    | u[97]  | H(4)...C(5)   | 2.1481 | 0.0194 | 0.0836 | Tied to u[35]  | 1.00 | 0.0004  | 1.3   | 0.1034 |
|    | u[558] | C(31)...H(34) | 2.1485 | 0.0194 | 0.0838 | Tied to u[35]  | 1.00 | 0.0008  | 1.3   | 0.1037 |
|    | u[459] | C(20)...H(23) | 2.1478 | 0.0194 | 0.0838 | Tied to u[35]  | 1.00 | 0.0001  | 1.3   | 0.1037 |
|    | u[471] | H(21)...C(22) | 2.1263 | 0.0174 | 0.0839 | Tied to u[35]  | 1.00 | -0.0001 | 1.3   | 0.1038 |
| 40 | u[262] | H(10)...C(11) | 2.1235 | 0.0185 | 0.0840 | Tied to u[35]  | 1.00 | -0.0001 | 1.3   | 0.1039 |
|    | u[559] | H(32)...C(33) | 2.1279 | 0.0174 | 0.0840 | Tied to u[35]  | 1.00 | 0.0015  | 1.3   | 0.1040 |
|    | u[519] | C(25)...H(28) | 2.1237 | 0.0185 | 0.0840 | Tied to u[35]  | 1.00 | 0.0001  | 1.3   | 0.1040 |
|    | u[354] | C(14)...H(17) | 2.1231 | 0.0185 | 0.0840 | Tied to u[35]  | 1.00 | -0.0005 | 1.3   | 0.1040 |
|    | u[68]  | C(3)...H(6)   | 2.1295 | 0.0174 | 0.0843 | Tied to u[35]  | 1.00 | 0.0032  | 1.3   | 0.1043 |
| 45 | u[547] | C(29)-H(30)   | 1.0642 | 0.0093 | 0.0869 | Tied to u[556] | 1.00 | 0.0038  | 2.6   | 0.0764 |
|    | u[426] | C(18)-H(19)   | 1.0642 | 0.0093 | 0.0869 | Tied to u[556] | 1.00 | 0.0038  | 2.6   | 0.0764 |
|    | u[184] | C(7)-H(8)     | 1.0642 | 0.0093 | 0.0869 | Tied to u[556] | 1.00 | 0.0038  | 2.6   | 0.0764 |
|    | u[132] | C(5)...C(11)  | 2.7845 | 0.0144 | 0.0870 | Tied to u[380] | 1.00 | -0.0068 | 5.9   | 0.0728 |
|    | u[391] | C(16)-H(17)   | 1.0615 | 0.0093 | 0.0878 | Tied to u[556] | 1.00 | 0.0039  | 2.6   | 0.0772 |
| 50 | u[286] | C(11)-H(12)   | 1.0616 | 0.0094 | 0.0878 | Tied to u[556] | 1.00 | 0.0038  | 2.6   | 0.0772 |
|    | u[352] | C(14)-H(15)   | 1.0616 | 0.0094 | 0.0878 | Tied to u[556] | 1.00 | 0.0038  | 2.6   | 0.0772 |
|    | u[237] | C(9)-H(10)    | 1.0615 | 0.0093 | 0.0878 | Tied to u[556] | 1.00 | 0.0039  | 2.6   | 0.0772 |
|    | u[517] | C(25)-H(26)   | 1.0616 | 0.0094 | 0.0879 | Tied to u[556] | 1.00 | 0.0038  | 2.6   | 0.0773 |
|    | u[534] | C(27)-H(28)   | 1.0615 | 0.0093 | 0.0879 | Tied to u[556] | 1.00 | 0.0039  | 2.6   | 0.0773 |
| 55 | u[522] | C(25)...C(31) | 2.7871 | 0.0144 | 0.0879 | Tied to u[380] | 1.00 | -0.0042 | 5.9   | 0.0736 |
|    | u[556] | C(31)-H(32)   | 1.0605 | 0.0094 | 0.0880 | 0.0047         | 1.00 | 0.0039  | 2.6   | 0.0774 |
|    | u[457] | C(20)-H(21)   | 1.0605 | 0.0094 | 0.0880 | Tied to u[556] | 1.00 | 0.0039  | 2.6   | 0.0774 |
|    | u[127] | C(5)-H(6)     | 1.0604 | 0.0094 | 0.0881 | Tied to u[556] | 1.00 | 0.0039  | 2.6   | 0.0775 |
|    | u[357] | C(14)...C(20) | 2.7881 | 0.0144 | 0.0882 | Tied to u[380] | 1.00 | -0.0031 | 5.9   | 0.0738 |
| 60 | u[66]  | C(3)-H(4)     | 1.0614 | 0.0094 | 0.0883 | Tied to u[556] | 1.00 | 0.0039  | 2.6   | 0.0776 |
|    | u[71]  | C(3)...C(9)   | 2.7893 | 0.0150 | 0.0883 | Tied to u[380] | 1.00 | 0.0015  | 5.9   | 0.0739 |
|    | u[484] | C(22)-H(23)   | 1.0613 | 0.0094 | 0.0884 | Tied to u[556] | 1.00 | 0.0038  | 2.6   | 0.0777 |
|    | u[561] | C(33)-H(34)   | 1.0613 | 0.0094 | 0.0884 | Tied to u[556] | 1.00 | 0.0038  | 2.6   | 0.0777 |
|    | u[539] | C(27)...C(33) | 2.7868 | 0.0150 | 0.0887 | Tied to u[380] | 1.00 | -0.0009 | 5.9   | 0.0742 |
| 65 | u[396] | C(16)...C(22) | 2.7853 | 0.0150 | 0.0888 | Tied to u[380] | 1.00 | -0.0024 | 5.9   | 0.0743 |
|    | u[8]   | Bi(1)...C(9)  | 4.5186 | 0.0130 | 0.0905 | Tied to u[15]  | 1.00 | -0.0175 | 50.1  | 0.0905 |
|    | u[26]  | Bi(1)...C(27) | 4.5196 | 0.0130 | 0.0907 | Tied to u[15]  | 1.00 | -0.0165 | 50.1  | 0.0907 |
|    | u[15]  | Bi(1)...C(16) | 4.5182 | 0.0130 | 0.0909 | 0.0092         | 1.00 | -0.0179 | 50.1  | 0.0909 |
|    | u[39]  | C(2)...H(8)   | 3.8509 | 0.0119 | 0.1052 | Tied to u[382] | 1.00 | -0.0184 | 0.7   | 0.0998 |
| 70 | u[336] | C(13)...H(19) | 3.8511 | 0.0119 | 0.1052 | Tied to u[382] | 1.00 | -0.0182 | 0.7   | 0.0998 |
|    | u[512] | C(24)...H(30) | 3.8507 | 0.0119 | 0.1053 | Tied to u[382] | 1.00 | -0.0186 | 0.7   | 0.0999 |
|    | u[28]  | Bi(1)...C(29) | 5.0399 | 0.0069 | 0.1054 | 0.0079         | 1.00 | -0.0251 | 44.9  | 0.0896 |
|    | u[6]   | Bi(1)...C(7)  | 5.0396 | 0.0069 | 0.1054 | Tied to u[28]  | 1.00 | -0.0254 | 44.9  | 0.0896 |
|    | u[17]  | Bi(1)...C(18) | 5.0392 | 0.0069 | 0.1059 | Tied to u[28]  | 1.00 | -0.0258 | 44.9  | 0.0900 |

|    |        |               |        |        |        |                |      |         |      |        |
|----|--------|---------------|--------|--------|--------|----------------|------|---------|------|--------|
|    | u[133] | C(5)...H(12)  | 3.8376 | 0.0170 | 0.1106 | Tied to u[382] | 1.00 | -0.0179 | 0.7  | 0.1049 |
|    | u[160] | H(6)...C(11)  | 3.8365 | 0.0170 | 0.1112 | Tied to u[382] | 1.00 | -0.0180 | 0.7  | 0.1055 |
|    | u[530] | H(23)...C(31) | 3.8402 | 0.0170 | 0.1116 | Tied to u[382] | 1.00 | -0.0152 | 0.7  | 0.1059 |
|    | u[72]  | C(3)...H(10)  | 3.8424 | 0.0175 | 0.1117 | Tied to u[382] | 1.00 | -0.0096 | 0.7  | 0.1060 |
| 5  | u[376] | H(15)...C(20) | 3.8412 | 0.0170 | 0.1119 | Tied to u[382] | 1.00 | -0.0142 | 0.7  | 0.1062 |
|    | u[523] | C(25)...H(32) | 3.8391 | 0.0170 | 0.1120 | Tied to u[382] | 1.00 | -0.0154 | 0.7  | 0.1063 |
|    | u[101] | H(4)...C(9)   | 3.8425 | 0.0176 | 0.1122 | Tied to u[382] | 1.00 | -0.0096 | 0.7  | 0.1065 |
|    | u[358] | C(14)...H(21) | 3.8401 | 0.0170 | 0.1123 | Tied to u[382] | 1.00 | -0.0144 | 0.7  | 0.1066 |
|    | u[545] | H(28)...C(33) | 3.8398 | 0.0175 | 0.1123 | Tied to u[382] | 1.00 | -0.0121 | 0.7  | 0.1066 |
| 10 | u[413] | H(17)...C(22) | 3.8384 | 0.0175 | 0.1124 | Tied to u[382] | 1.00 | -0.0135 | 0.7  | 0.1067 |
|    | u[540] | C(27)...H(34) | 3.8398 | 0.0176 | 0.1129 | Tied to u[382] | 1.00 | -0.0122 | 0.7  | 0.1071 |
|    | u[397] | C(16)...H(23) | 3.8383 | 0.0176 | 0.1131 | Tied to u[382] | 1.00 | -0.0137 | 0.7  | 0.1073 |
|    | u[444] | H(19)...C(22) | 3.8861 | 0.0156 | 0.1142 | Tied to u[361] | 1.00 | -0.0087 | 0.8  | 0.0979 |
|    | u[70]  | C(3)...H(8)   | 3.3857 | 0.0156 | 0.1143 | Tied to u[361] | 1.00 | -0.0091 | 0.8  | 0.0980 |
| 15 | u[554] | H(30)...C(33) | 3.3865 | 0.0156 | 0.1146 | Tied to u[361] | 1.00 | -0.0083 | 0.8  | 0.0982 |
|    | u[521] | C(25)...H(30) | 3.3884 | 0.0157 | 0.1153 | Tied to u[361] | 1.00 | -0.0065 | 0.8  | 0.0988 |
|    | u[356] | C(14)...H(19) | 3.3865 | 0.0157 | 0.1153 | Tied to u[361] | 1.00 | -0.0084 | 0.8  | 0.0988 |
|    | u[213] | H(8)...C(11)  | 3.3906 | 0.0157 | 0.1155 | Tied to u[361] | 1.00 | -0.0043 | 0.8  | 0.0990 |
|    | u[131] | C(5)...H(10)  | 3.3569 | 0.0147 | 0.1160 | Tied to u[361] | 1.00 | -0.0246 | 0.8  | 0.0994 |
| 20 | u[543] | H(28)...C(31) | 3.3586 | 0.0147 | 0.1162 | Tied to u[361] | 1.00 | -0.0229 | 0.8  | 0.0996 |
|    | u[103] | H(4)...C(11)  | 3.3495 | 0.0134 | 0.1162 | Tied to u[361] | 1.00 | -0.0231 | 0.8  | 0.0996 |
|    | u[411] | H(17)...C(20) | 3.3613 | 0.0147 | 0.1163 | Tied to u[361] | 1.00 | -0.0202 | 0.8  | 0.0997 |
|    | u[525] | C(25)...H(34) | 3.3508 | 0.0134 | 0.1164 | Tied to u[361] | 1.00 | -0.0218 | 0.8  | 0.0998 |
|    | u[360] | C(14)...H(23) | 3.3535 | 0.0134 | 0.1165 | Tied to u[361] | 1.00 | -0.0191 | 0.8  | 0.0999 |
| 25 | u[532] | H(26)...C(33) | 3.3692 | 0.0139 | 0.1167 | Tied to u[361] | 1.00 | -0.0219 | 0.8  | 0.1000 |
|    | u[378] | H(15)...C(22) | 3.3725 | 0.0139 | 0.1167 | Tied to u[361] | 1.00 | -0.0186 | 0.8  | 0.1000 |
|    | u[74]  | C(3)...H(12)  | 3.3671 | 0.0139 | 0.1167 | Tied to u[361] | 1.00 | -0.0240 | 0.8  | 0.1000 |
|    | u[538] | C(27)...H(32) | 3.3553 | 0.0166 | 0.1168 | Tied to u[361] | 1.00 | -0.0237 | 0.8  | 0.1001 |
|    | u[395] | C(16)...H(21) | 3.3585 | 0.0166 | 0.1168 | Tied to u[361] | 1.00 | -0.0205 | 0.8  | 0.1001 |
| 30 | u[158] | H(6)...C(9)   | 3.3525 | 0.0166 | 0.1170 | Tied to u[361] | 1.00 | -0.0265 | 0.8  | 0.1003 |
|    | u[29]  | Bi(1)...H(30) | 6.0909 | 0.0113 | 0.1191 | 0.0095         | 1.00 | -0.0414 | 6.2  | 0.1163 |
|    | u[7]   | Bi(1)...H(8)  | 6.0905 | 0.0113 | 0.1191 | Tied to u[29]  | 1.00 | -0.0418 | 6.2  | 0.1163 |
|    | u[10]  | Bi(1)...C(11) | 3.2094 | 0.0117 | 0.1191 | Tied to u[389] | 1.00 | -0.0043 | 70.5 | 0.0954 |
|    | u[18]  | Bi(1)...H(19) | 6.0900 | 0.0113 | 0.1194 | Tied to u[29]  | 1.00 | -0.0423 | 6.2  | 0.1166 |
| 35 | u[24]  | Bi(1)...C(25) | 3.2099 | 0.0117 | 0.1197 | Tied to u[389] | 1.00 | -0.0038 | 70.5 | 0.0959 |
|    | u[13]  | Bi(1)...C(14) | 3.2086 | 0.0117 | 0.1199 | Tied to u[389] | 1.00 | -0.0050 | 70.5 | 0.0960 |
|    | u[188] | C(7)...H(12)  | 3.3762 | 0.0155 | 0.1217 | Tied to u[361] | 1.00 | -0.0013 | 0.8  | 0.1043 |
|    | u[99]  | H(4)...C(7)   | 3.3917 | 0.0183 | 0.1219 | Tied to u[361] | 1.00 | -0.0030 | 0.8  | 0.1045 |
|    | u[374] | H(15)...C(18) | 3.3719 | 0.0155 | 0.1219 | Tied to u[361] | 1.00 | -0.0056 | 0.8  | 0.1045 |
| 40 | u[41]  | C(2)...H(10)  | 3.3620 | 0.0182 | 0.1220 | Tied to u[361] | 1.00 | -0.0047 | 0.8  | 0.1046 |
|    | u[528] | H(26)...C(29) | 3.3745 | 0.0155 | 0.1220 | Tied to u[361] | 1.00 | -0.0030 | 0.8  | 0.1046 |
|    | u[551] | C(29)...H(34) | 3.3913 | 0.0183 | 0.1228 | Tied to u[361] | 1.00 | -0.0034 | 0.8  | 0.1053 |
|    | u[430] | C(18)...H(23) | 3.3894 | 0.0183 | 0.1228 | Tied to u[361] | 1.00 | -0.0053 | 0.8  | 0.1053 |
|    | u[510] | C(24)...H(28) | 3.3615 | 0.0182 | 0.1230 | Tied to u[361] | 1.00 | -0.0052 | 0.8  | 0.1054 |
| 45 | u[334] | C(13)...H(17) | 3.3599 | 0.0182 | 0.1230 | Tied to u[361] | 1.00 | -0.0068 | 0.8  | 0.1054 |
|    | u[338] | C(13)...H(21) | 3.3667 | 0.0178 | 0.1237 | Tied to u[361] | 1.00 | -0.0066 | 0.8  | 0.1060 |
|    | u[37]  | C(2)...H(6)   | 3.3714 | 0.0178 | 0.1238 | Tied to u[361] | 1.00 | -0.0019 | 0.8  | 0.1061 |
|    | u[514] | C(24)...H(32) | 3.3692 | 0.0178 | 0.1238 | Tied to u[361] | 1.00 | -0.0041 | 0.8  | 0.1061 |
|    | u[4]   | Bi(1)...C(5)  | 4.4925 | 0.0160 | 0.1254 | 0.0147         | 1.00 | -0.0113 | 50.4 | 0.1007 |
| 50 | u[30]  | Bi(1)...C(31) | 4.4905 | 0.0160 | 0.1257 | Tied to u[4]   | 1.00 | -0.0133 | 50.4 | 0.1009 |
|    | u[19]  | Bi(1)...C(20) | 4.4882 | 0.0160 | 0.1264 | Tied to u[4]   | 1.00 | -0.0156 | 50.4 | 0.1015 |
|    | u[161] | H(6)...H(12)  | 4.8873 | 0.0187 | 0.1309 | (fixed)        | 1.00 | -0.0317 | 0.1  | 0.1309 |
|    | u[102] | H(4)...H(10)  | 4.8929 | 0.0193 | 0.1319 | (fixed)        | 1.00 | -0.0234 | 0.1  | 0.1319 |
|    | u[531] | H(26)...H(32) | 4.8899 | 0.0187 | 0.1320 | (fixed)        | 1.00 | -0.0290 | 0.1  | 0.1320 |
| 55 | u[377] | H(15)...H(21) | 4.8909 | 0.0187 | 0.1324 | (fixed)        | 1.00 | -0.0280 | 0.1  | 0.1324 |
|    | u[546] | H(28)...H(34) | 4.8904 | 0.0193 | 0.1329 | (fixed)        | 1.00 | -0.0259 | 0.1  | 0.1329 |
|    | u[414] | H(17)...H(23) | 4.8889 | 0.0193 | 0.1332 | (fixed)        | 1.00 | -0.0274 | 0.1  | 0.1332 |
|    | u[2]   | Bi(1)...C(3)  | 3.1696 | 0.0136 | 0.1333 | Tied to u[389] | 1.00 | 0.0014  | 71.4 | 0.1068 |
|    | u[32]  | Bi(1)...C(33) | 3.1674 | 0.0136 | 0.1340 | Tied to u[389] | 1.00 | -0.0007 | 71.5 | 0.1073 |
| 60 | u[104] | H(4)...H(12)  | 4.2284 | 0.0172 | 0.1348 | (fixed)        | 1.00 | -0.0393 | 0.1  | 0.1348 |
|    | u[379] | H(15)...H(23) | 4.2352 | 0.0172 | 0.1349 | (fixed)        | 1.00 | -0.0325 | 0.1  | 0.1349 |
|    | u[21]  | Bi(1)...C(22) | 3.1656 | 0.0136 | 0.1350 | Tied to u[389] | 1.00 | -0.0025 | 71.5 | 0.1081 |
|    | u[533] | H(26)...H(34) | 4.2306 | 0.0172 | 0.1350 | (fixed)        | 1.00 | -0.0370 | 0.1  | 0.1350 |
|    | u[544] | H(28)...H(32) | 4.2337 | 0.0194 | 0.1359 | (fixed)        | 1.00 | -0.0389 | 0.1  | 0.1359 |
| 65 | u[412] | H(17)...H(21) | 4.2381 | 0.0194 | 0.1360 | (fixed)        | 1.00 | -0.0345 | 0.1  | 0.1360 |
|    | u[159] | H(6)...H(10)  | 4.2307 | 0.0194 | 0.1361 | (fixed)        | 1.00 | -0.0419 | 0.1  | 0.1361 |
|    | u[100] | H(4)...H(8)   | 4.2682 | 0.0224 | 0.1377 | (fixed)        | 1.00 | -0.0131 | 0.1  | 0.1377 |
|    | u[375] | H(15)...H(19) | 4.2405 | 0.0195 | 0.1381 | (fixed)        | 1.00 | -0.0147 | 0.1  | 0.1381 |
|    | u[529] | H(26)...H(30) | 4.2439 | 0.0195 | 0.1382 | (fixed)        | 1.00 | -0.0113 | 0.1  | 0.1382 |
| 70 | u[214] | H(8)...H(12)  | 4.2466 | 0.0195 | 0.1383 | (fixed)        | 1.00 | -0.0086 | 0.1  | 0.1383 |
|    | u[445] | H(19)...H(23) | 4.2667 | 0.0224 | 0.1383 | (fixed)        | 1.00 | -0.0146 | 0.1  | 0.1383 |
|    | u[555] | H(30)...H(34) | 4.2683 | 0.0224 | 0.1384 | (fixed)        | 1.00 | -0.0129 | 0.1  | 0.1384 |
|    | u[9]   | Bi(1)...H(10) | 5.3160 | 0.0237 | 0.1420 | (fixed)        | 1.00 | -0.0238 | 7.1  | 0.1420 |
|    | u[27]  | Bi(1)...H(28) | 5.3169 | 0.0237 | 0.1426 | (fixed)        | 1.00 | -0.0229 | 7.1  | 0.1426 |

|    |        |               |        |        |        |                |      |        |      |        |
|----|--------|---------------|--------|--------|--------|----------------|------|--------|------|--------|
|    | u[16]  | Bi(1)...H(17) | 5.3146 | 0.0237 | 0.1427 | (fixed)        | 1.00 | -.0252 | 7.1  | 0.1427 |
|    | u[31]  | Bi(1)...H(32) | 5.2770 | 0.0239 | 0.1541 | (fixed)        | 1.00 | -.0178 | 7.1  | 0.1541 |
|    | u[5]   | Bi(1)...H(6)  | 5.2806 | 0.0239 | 0.1541 | (fixed)        | 1.00 | -.0142 | 7.1  | 0.1541 |
|    | u[20]  | Bi(1)...H(21) | 5.2730 | 0.0239 | 0.1546 | (fixed)        | 1.00 | -.0218 | 7.2  | 0.1546 |
| 5  | u[373] | H(15)...H(17) | 2.4023 | 0.0251 | 0.1634 | Tied to u[527] | 1.00 | -.0016 | 0.2  | 0.1672 |
|    | u[98]  | H(4)...H(6)   | 2.4499 | 0.0289 | 0.1634 | Tied to u[527] | 1.00 | -.0019 | 0.2  | 0.1672 |
|    | u[472] | H(21)...H(23) | 2.4500 | 0.0289 | 0.1634 | Tied to u[527] | 1.00 | -.0018 | 0.2  | 0.1672 |
|    | u[263] | H(10)...H(12) | 2.4020 | 0.0251 | 0.1636 | Tied to u[527] | 1.00 | -.0019 | 0.2  | 0.1674 |
|    | u[527] | H(26)...H(28) | 2.4021 | 0.0251 | 0.1636 | 0.0196         | 1.00 | -.0018 | 0.2  | 0.1674 |
| 10 | u[560] | H(32)...H(34) | 2.4498 | 0.0289 | 0.1636 | Tied to u[527] | 1.00 | -.0020 | 0.2  | 0.1674 |
|    | u[212] | H(8)...H(10)  | 2.4664 | 0.0262 | 0.1654 | Tied to u[527] | 1.00 | -.0057 | 0.2  | 0.1693 |
|    | u[410] | H(17)...H(19) | 2.4692 | 0.0262 | 0.1655 | Tied to u[527] | 1.00 | -.0029 | 0.2  | 0.1694 |
|    | u[542] | H(28)...H(30) | 2.4685 | 0.0262 | 0.1656 | Tied to u[527] | 1.00 | -.0036 | 0.2  | 0.1695 |
|    | u[553] | H(30)...H(32) | 2.4706 | 0.0277 | 0.1659 | Tied to u[527] | 1.00 | -.0011 | 0.2  | 0.1698 |
| 15 | u[443] | H(19)...H(21) | 2.4694 | 0.0277 | 0.1659 | Tied to u[527] | 1.00 | -.0023 | 0.2  | 0.1698 |
|    | u[157] | H(6)...H(8)   | 2.4726 | 0.0277 | 0.1661 | Tied to u[527] | 1.00 | 0.0009 | 0.2  | 0.1700 |
|    | u[485] | C(22)...C(24) | 4.5711 | 0.0222 | 0.1762 | 0.0164         | 1.00 | -.0947 | 3.6  | 0.1723 |
|    | u[75]  | C(3)...C(13)  | 4.5738 | 0.0222 | 0.1864 | Tied to u[485] | 1.00 | -.0912 | 3.6  | 0.1823 |
|    | u[460] | C(20)...C(24) | 5.6336 | 0.0256 | 0.1918 | (fixed)        | 1.00 | -.0840 | 2.9  | 0.1918 |
| 20 | u[64]  | C(2)...C(33)  | 4.5675 | 0.0222 | 0.1930 | Tied to u[485] | 1.00 | -.0970 | 3.6  | 0.1888 |
|    | u[341] | C(13)...C(24) | 3.3178 | 0.0240 | 0.1934 | Tied to u[389] | 1.00 | -.0002 | 4.9  | 0.1549 |
|    | u[44]  | C(2)...C(13)  | 3.3174 | 0.0240 | 0.1963 | Tied to u[389] | 1.00 | -.0002 | 4.9  | 0.1572 |
|    | u[55]  | C(2)...C(24)  | 3.3163 | 0.0240 | 0.2004 | Tied to u[389] | 1.00 | -.0008 | 4.9  | 0.1605 |
|    | u[134] | C(5)...C(13)  | 5.6303 | 0.0256 | 0.2050 | (fixed)        | 1.00 | -.0864 | 2.9  | 0.2050 |
| 25 | u[62]  | C(2)...C(31)  | 5.6246 | 0.0256 | 0.2118 | (fixed)        | 1.00 | -.0916 | 2.9  | 0.2118 |
|    | u[473] | H(21)...C(24) | 6.5653 | 0.0275 | 0.2138 | (fixed)        | 1.00 | -.1340 | 0.4  | 0.2138 |
|    | u[11]  | Bi(1)...H(12) | 3.2924 | 0.0195 | 0.2286 | Tied to u[389] | 1.00 | 0.0057 | 11.5 | 0.1831 |
|    | u[162] | H(6)...C(13)  | 6.5665 | 0.0275 | 0.2291 | (fixed)        | 1.00 | -.1318 | 0.4  | 0.2291 |
|    | u[25]  | Bi(1)...H(26) | 3.2906 | 0.0195 | 0.2302 | Tied to u[389] | 1.00 | 0.0041 | 11.5 | 0.1844 |
| 30 | u[14]  | Bi(1)...H(15) | 3.2887 | 0.0195 | 0.2304 | Tied to u[389] | 1.00 | 0.0023 | 11.5 | 0.1845 |
|    | u[431] | C(18)...C(24) | 5.7266 | 0.0325 | 0.2331 | (fixed)        | 1.00 | -.0124 | 2.9  | 0.2331 |
|    | u[496] | H(23)...C(24) | 4.8978 | 0.0266 | 0.2358 | Tied to u[407] | 1.00 | -.1581 | 0.6  | 0.2363 |
|    | u[189] | C(7)...C(13)  | 5.7156 | 0.0325 | 0.2369 | (fixed)        | 1.00 | -.0231 | 2.9  | 0.2369 |
|    | u[63]  | C(2)...H(32)  | 6.5579 | 0.0275 | 0.2382 | (fixed)        | 1.00 | -.1397 | 0.4  | 0.2382 |
| 35 | u[105] | H(4)...C(13)  | 4.9078 | 0.0266 | 0.2412 | Tied to u[407] | 1.00 | -.1476 | 0.6  | 0.2417 |
|    | u[3]   | Bi(1)...H(4)  | 3.1636 | 0.0290 | 0.2427 | Tied to u[389] | 1.00 | 0.0080 | 11.9 | 0.1944 |
|    | u[60]  | C(2)...C(29)  | 5.7134 | 0.0325 | 0.2439 | (fixed)        | 1.00 | -.0247 | 2.9  | 0.2439 |
|    | u[33]  | Bi(1)...H(34) | 3.1628 | 0.0290 | 0.2452 | Tied to u[389] | 1.00 | 0.0076 | 11.9 | 0.1964 |
|    | u[22]  | Bi(1)...H(23) | 3.1601 | 0.0290 | 0.2463 | Tied to u[389] | 1.00 | 0.0051 | 11.9 | 0.1973 |
| 40 | u[65]  | C(2)...H(34)  | 4.8987 | 0.0266 | 0.2521 | Tied to u[407] | 1.00 | -.1557 | 0.6  | 0.2526 |
|    | u[446] | H(19)...C(24) | 6.7100 | 0.0375 | 0.2651 | (fixed)        | 1.00 | -.0268 | 0.4  | 0.2651 |
|    | u[215] | H(8)...C(13)  | 6.6970 | 0.0375 | 0.2692 | (fixed)        | 1.00 | -.0394 | 0.4  | 0.2692 |
|    | u[61]  | C(2)...H(30)  | 6.6949 | 0.0375 | 0.2762 | (fixed)        | 1.00 | -.0410 | 0.4  | 0.2762 |
|    | u[240] | C(9)...C(13)  | 4.7662 | 0.0383 | 0.2783 | Tied to u[398] | 1.00 | 0.0722 | 3.4  | 0.2790 |
| 45 | u[346] | C(13)...C(29) | 5.6655 | 0.0325 | 0.2862 | (fixed)        | 1.00 | -.0347 | 2.9  | 0.2862 |
|    | u[398] | C(16)...C(24) | 4.7796 | 0.0383 | 0.2884 | 0.0288         | 1.00 | 0.0868 | 3.4  | 0.2891 |
|    | u[58]  | C(2)...C(27)  | 4.7673 | 0.0383 | 0.2895 | Tied to u[398] | 1.00 | 0.0747 | 3.4  | 0.2902 |
|    | u[49]  | C(2)...C(18)  | 5.6688 | 0.0325 | 0.2900 | (fixed)        | 1.00 | -.0310 | 2.9  | 0.2900 |
|    | u[200] | C(7)...C(24)  | 5.6635 | 0.0325 | 0.2941 | (fixed)        | 1.00 | -.0359 | 2.9  | 0.2941 |
| 50 | u[287] | C(11)...C(13) | 3.4417 | 0.0355 | 0.3109 | Tied to u[361] | 1.00 | 0.1183 | 4.8  | 0.2665 |
|    | u[490] | C(22)...C(29) | 6.9202 | 0.0323 | 0.3216 | (fixed)        | 1.00 | -.1768 | 2.4  | 0.3216 |
|    | u[361] | C(14)...C(24) | 3.4494 | 0.0356 | 0.3266 | 0.0166         | 1.00 | 0.1290 | 4.7  | 0.2800 |
|    | u[56]  | C(2)...C(25)  | 3.4420 | 0.0356 | 0.3278 | Tied to u[361] | 1.00 | 0.1218 | 4.8  | 0.2810 |
|    | u[347] | C(13)...H(30) | 6.6393 | 0.0359 | 0.3302 | (fixed)        | 1.00 | -.0527 | 0.4  | 0.3302 |
| 55 | u[50]  | C(2)...H(19)  | 6.6431 | 0.0359 | 0.3341 | (fixed)        | 1.00 | -.0485 | 0.4  | 0.3341 |
|    | u[226] | H(8)...C(24)  | 6.6373 | 0.0359 | 0.3380 | (fixed)        | 1.00 | -.0539 | 0.4  | 0.3380 |
|    | u[80]  | C(3)...C(18)  | 6.9231 | 0.0323 | 0.3415 | (fixed)        | 1.00 | -.1720 | 2.4  | 0.3415 |
|    | u[501] | H(23)...C(29) | 7.3985 | 0.0315 | 0.3448 | (fixed)        | 1.00 | -.2787 | 0.4  | 0.3448 |
|    | u[209] | C(7)...C(33)  | 6.9108 | 0.0323 | 0.3540 | (fixed)        | 1.00 | -.1831 | 2.4  | 0.3540 |
| 60 | u[108] | H(4)...C(16)  | 6.8898 | 0.0320 | 0.3547 | (fixed)        | 1.00 | -.2650 | 0.4  | 0.3547 |
|    | u[251] | C(9)...C(24)  | 5.2138 | 0.0409 | 0.3642 | (fixed)        | 1.00 | -.0243 | 3.1  | 0.3642 |
|    | u[264] | H(10)...C(13) | 5.2198 | 0.0502 | 0.3652 | (fixed)        | 1.00 | 0.1268 | 0.5  | 0.3652 |
|    | u[261] | C(9)...H(34)  | 6.8939 | 0.0320 | 0.3655 | (fixed)        | 1.00 | -.2598 | 0.4  | 0.3655 |
|    | u[110] | H(4)...C(18)  | 7.4092 | 0.0315 | 0.3660 | (fixed)        | 1.00 | -.2660 | 0.4  | 0.3660 |
| 65 | u[491] | C(22)...H(30) | 7.8787 | 0.0364 | 0.3747 | (fixed)        | 1.00 | -.2063 | 0.3  | 0.3747 |
|    | u[106] | H(4)...C(14)  | 5.6523 | 0.0293 | 0.3784 | (fixed)        | 1.00 | -.2174 | 0.5  | 0.3784 |
|    | u[59]  | C(2)...H(28)  | 5.2214 | 0.0502 | 0.3804 | (fixed)        | 1.00 | 0.1306 | 0.5  | 0.3804 |
|    | u[344] | C(13)...C(27) | 5.2115 | 0.0409 | 0.3809 | (fixed)        | 1.00 | -.0242 | 3.1  | 0.3809 |
|    | u[415] | H(17)...C(24) | 5.2346 | 0.0502 | 0.3826 | (fixed)        | 1.00 | 0.1442 | 0.5  | 0.3826 |
| 70 | u[502] | H(23)...H(30) | 8.3861 | 0.0342 | 0.3863 | (fixed)        | 1.00 | -.3182 | 0.1  | 0.3863 |
|    | u[260] | C(9)...C(33)  | 6.4470 | 0.0382 | 0.3866 | (fixed)        | 1.00 | -.1673 | 2.5  | 0.3866 |
|    | u[210] | C(7)...H(34)  | 7.3938 | 0.0315 | 0.3868 | (fixed)        | 1.00 | -.2794 | 0.4  | 0.3868 |
|    | u[47]  | C(2)...C(16)  | 5.1983 | 0.0409 | 0.3925 | (fixed)        | 1.00 | -.0357 | 3.1  | 0.3925 |
|    | u[308] | C(11)...H(34) | 5.6614 | 0.0293 | 0.3925 | (fixed)        | 1.00 | -.2065 | 0.5  | 0.3925 |

|    |        |               |        |        |        |                |      |        |     |        |
|----|--------|---------------|--------|--------|--------|----------------|------|--------|-----|--------|
|    | u[81]  | C(3)...H(19)  | 7.8818 | 0.0364 | 0.3953 | (fixed)        | 1.00 | -.2013 | 0.3 | 0.3953 |
|    | u[298] | C(11)...C(24) | 4.0654 | 0.0408 | 0.4027 | Tied to u[385] | 1.00 | -.0133 | 4.0 | 0.4015 |
|    | u[78]  | C(3)...C(16)  | 6.4358 | 0.0382 | 0.4030 | (fixed)        | 1.00 | -.1766 | 2.5 | 0.4030 |
| 5  | u[235] | H(8)...C(33)  | 7.8686 | 0.0364 | 0.4084 | (fixed)        | 1.00 | -.2132 | 0.3 | 0.4084 |
|    | u[111] | H(4)...H(19)  | 8.3971 | 0.0342 | 0.4096 | (fixed)        | 1.00 | -.3051 | 0.1 | 0.4096 |
|    | u[465] | C(20)...C(29) | 7.7085 | 0.0409 | 0.4124 | (fixed)        | 1.00 | -.1660 | 2.1 | 0.4124 |
|    | u[307] | C(11)...C(33) | 5.2882 | 0.0344 | 0.4149 | (fixed)        | 1.00 | -.1322 | 3.1 | 0.4149 |
|    | u[76]  | C(3)...C(14)  | 5.2719 | 0.0344 | 0.4209 | (fixed)        | 1.00 | -.1475 | 3.1 | 0.4209 |
|    | u[45]  | C(2)...C(14)  | 4.0443 | 0.0408 | 0.4210 | Tied to u[385] | 1.00 | -.0307 | 4.0 | 0.4198 |
| 10 | u[342] | C(13)...C(25) | 4.0600 | 0.0408 | 0.4229 | Tied to u[385] | 1.00 | -.0146 | 4.0 | 0.4217 |
|    | u[488] | C(22)...C(27) | 6.4517 | 0.0382 | 0.4282 | (fixed)        | 1.00 | -.1575 | 2.5 | 0.4282 |
|    | u[499] | H(23)...C(27) | 6.8943 | 0.0320 | 0.4285 | (fixed)        | 1.00 | -.2524 | 0.4 | 0.4285 |
|    | u[236] | H(8)...H(34)  | 8.3806 | 0.0342 | 0.4319 | (fixed)        | 1.00 | -.3194 | 0.1 | 0.4319 |
|    | u[478] | H(21)...C(29) | 8.6739 | 0.0413 | 0.4350 | (fixed)        | 1.00 | -.2519 | 0.3 | 0.4350 |
| 15 | u[139] | C(5)...C(18)  | 7.7026 | 0.0409 | 0.4366 | (fixed)        | 1.00 | -.1693 | 2.1 | 0.4366 |
|    | u[207] | C(7)...C(31)  | 7.6889 | 0.0410 | 0.4500 | (fixed)        | 1.00 | -.1815 | 2.1 | 0.4500 |
|    | u[53]  | C(2)...C(22)  | 3.9179 | 0.0321 | 0.4501 | Tied to u[350] | 1.00 | -.0186 | 4.2 | 0.4581 |
|    | u[350] | C(13)...C(33) | 3.8978 | 0.0322 | 0.4610 | 0.0485         | 1.00 | -.0362 | 4.2 | 0.4692 |
|    | u[486] | C(22)...C(25) | 5.2888 | 0.0344 | 0.4630 | (fixed)        | 1.00 | -.1238 | 3.1 | 0.4630 |
| 20 | u[497] | H(23)...C(25) | 5.6582 | 0.0294 | 0.4633 | (fixed)        | 1.00 | -.1994 | 0.5 | 0.4633 |
|    | u[167] | H(6)...C(18)  | 8.6706 | 0.0413 | 0.4689 | (fixed)        | 1.00 | -.2517 | 0.3 | 0.4689 |
|    | u[86]  | C(3)...C(24)  | 3.8925 | 0.0322 | 0.4800 | Tied to u[350] | 1.00 | -.0370 | 4.2 | 0.4886 |
|    | u[51]  | C(2)...C(20)  | 5.0929 | 0.0327 | 0.4863 | Tied to u[28]  | 1.00 | -.0237 | 3.2 | 0.4133 |
|    | u[208] | C(7)...H(32)  | 8.6530 | 0.0413 | 0.4883 | (fixed)        | 1.00 | -.2673 | 0.3 | 0.4883 |
| 25 | u[466] | C(20)...H(30) | 8.5929 | 0.0463 | 0.4897 | (fixed)        | 1.00 | -.1970 | 0.3 | 0.4897 |
|    | u[258] | C(9)...C(31)  | 7.2769 | 0.0485 | 0.4926 | (fixed)        | 1.00 | -.1640 | 2.2 | 0.4926 |
|    | u[305] | C(11)...C(31) | 6.2455 | 0.0435 | 0.4998 | (fixed)        | 1.00 | -.1271 | 2.6 | 0.4998 |
|    | u[259] | C(9)...H(32)  | 8.2315 | 0.0478 | 0.5022 | (fixed)        | 1.00 | -.2444 | 0.3 | 0.5022 |
|    | u[306] | C(11)...H(32) | 7.1829 | 0.0422 | 0.5058 | (fixed)        | 1.00 | -.1892 | 0.4 | 0.5058 |
| 30 | u[306] | C(11)...H(32) | 7.1829 | 0.0422 | 0.5058 | (fixed)        | 1.00 | -.1892 | 0.4 | 0.5058 |
|    | u[348] | C(13)...C(31) | 5.0723 | 0.0327 | 0.5074 | Tied to u[28]  | 1.00 | -.0402 | 3.2 | 0.4312 |
|    | u[309] | H(12)...C(13) | 2.8918 | 0.0430 | 0.5088 | Tied to u[380] | 1.00 | 0.2832 | 0.9 | 0.4258 |
|    | u[109] | H(4)...H(17)  | 7.5531 | 0.0402 | 0.5094 | (fixed)        | 1.00 | -.3038 | 0.1 | 0.5094 |
|    | u[492] | C(22)...C(31) | 6.3065 | 0.0295 | 0.5105 | (fixed)        | 1.00 | -.1741 | 2.6 | 0.5105 |
| 35 | u[436] | C(18)...C(29) | 7.4315 | 0.0553 | 0.5143 | (fixed)        | 1.00 | -.0384 | 2.2 | 0.5143 |
|    | u[140] | C(5)...H(19)  | 8.5862 | 0.0463 | 0.5151 | (fixed)        | 1.00 | -.2008 | 0.3 | 0.5151 |
|    | u[479] | H(21)...H(30) | 9.5551 | 0.0466 | 0.5169 | (fixed)        | 1.00 | -.2937 | 0.0 | 0.5169 |
|    | u[163] | H(6)...C(14)  | 7.1623 | 0.0422 | 0.5179 | (fixed)        | 1.00 | -.2081 | 0.4 | 0.5179 |
|    | u[135] | C(5)...C(14)  | 6.2214 | 0.0435 | 0.5209 | (fixed)        | 1.00 | -.1479 | 2.6 | 0.5209 |
| 40 | u[194] | C(7)...C(18)  | 7.4182 | 0.0553 | 0.5226 | (fixed)        | 1.00 | -.0506 | 2.2 | 0.5226 |
|    | u[285] | H(10)...H(34) | 7.5675 | 0.0402 | 0.5236 | (fixed)        | 1.00 | -.2875 | 0.1 | 0.5236 |
|    | u[503] | H(23)...C(31) | 6.7624 | 0.0343 | 0.5256 | (fixed)        | 1.00 | -.2643 | 0.4 | 0.5256 |
|    | u[275] | H(10)...C(24) | 5.9316 | 0.0517 | 0.5261 | (fixed)        | 1.00 | -.0348 | 0.5 | 0.5261 |
|    | u[165] | H(6)...C(16)  | 8.2161 | 0.0478 | 0.5263 | (fixed)        | 1.00 | -.2569 | 0.3 | 0.5263 |
| 45 | u[137] | C(5)...C(16)  | 7.2579 | 0.0486 | 0.5277 | (fixed)        | 1.00 | -.1783 | 2.3 | 0.5277 |
|    | u[233] | H(8)...C(31)  | 8.5710 | 0.0463 | 0.5296 | (fixed)        | 1.00 | -.2143 | 0.3 | 0.5296 |
|    | u[145] | C(5)...C(24)  | 5.0667 | 0.0328 | 0.5322 | Tied to u[28]  | 1.00 | -.0408 | 3.2 | 0.4523 |
|    | u[82]  | C(3)...C(20)  | 6.3321 | 0.0295 | 0.5323 | (fixed)        | 1.00 | -.1451 | 2.6 | 0.5323 |
|    | u[293] | C(11)...H(19) | 6.1359 | 0.0526 | 0.5328 | (fixed)        | 1.00 | 0.1450 | 0.4 | 0.5328 |
| 50 | u[205] | C(7)...C(29)  | 7.4067 | 0.0554 | 0.5333 | (fixed)        | 1.00 | -.0605 | 2.2 | 0.5333 |
|    | u[463] | C(20)...C(27) | 7.2889 | 0.0486 | 0.5341 | (fixed)        | 1.00 | -.1463 | 2.2 | 0.5341 |
|    | u[494] | C(22)...C(33) | 5.1103 | 0.0274 | 0.5358 | (fixed)        | 1.00 | -.1447 | 3.2 | 0.5358 |
|    | u[380] | H(15)...C(24) | 2.8931 | 0.0432 | 0.5425 | 0.0244         | 1.00 | 0.2976 | 0.9 | 0.4540 |
|    | u[367] | C(14)...H(30) | 6.1424 | 0.0526 | 0.5439 | (fixed)        | 1.00 | 0.1535 | 0.4 | 0.5439 |
| 55 | u[227] | H(8)...C(25)  | 6.1318 | 0.0526 | 0.5454 | (fixed)        | 1.00 | 0.1431 | 0.4 | 0.5454 |
|    | u[57]  | C(2)...H(26)  | 2.8840 | 0.0432 | 0.5457 | Tied to u[380] | 1.00 | 0.2898 | 0.9 | 0.4567 |
|    | u[461] | C(20)...C(25) | 6.2524 | 0.0436 | 0.5469 | (fixed)        | 1.00 | -.1126 | 2.6 | 0.5469 |
|    | u[345] | C(13)...H(28) | 5.9272 | 0.0517 | 0.5471 | (fixed)        | 1.00 | -.0354 | 0.5 | 0.5471 |
|    | u[505] | H(23)...C(33) | 5.4963 | 0.0338 | 0.5503 | (fixed)        | 1.00 | -.2145 | 0.5 | 0.5503 |
| 60 | u[48]  | C(2)...H(17)  | 5.9065 | 0.0517 | 0.5519 | (fixed)        | 1.00 | -.0552 | 0.5 | 0.5519 |
|    | u[168] | H(6)...H(19)  | 9.5507 | 0.0466 | 0.5534 | (fixed)        | 1.00 | -.2942 | 0.0 | 0.5534 |
|    | u[84]  | C(3)...C(22)  | 5.1390 | 0.0274 | 0.5571 | (fixed)        | 1.00 | -.1116 | 3.2 | 0.5571 |
|    | u[476] | H(21)...C(27) | 8.2444 | 0.0478 | 0.5583 | (fixed)        | 1.00 | -.2245 | 0.3 | 0.5583 |
|    | u[292] | C(11)...C(18) | 5.2408 | 0.0496 | 0.5590 | Tied to u[28]  | 1.00 | 0.1527 | 3.1 | 0.4751 |
| 65 | u[252] | C(9)...C(25)  | 4.9078 | 0.0643 | 0.5650 | Tied to u[364] | 1.00 | 0.1625 | 3.3 | 0.5639 |
|    | u[474] | H(21)...C(25) | 7.1905 | 0.0422 | 0.5682 | (fixed)        | 1.00 | -.1725 | 0.4 | 0.5682 |
|    | u[154] | C(5)...C(33)  | 6.2976 | 0.0295 | 0.5701 | (fixed)        | 1.00 | -.1732 | 2.6 | 0.5701 |
|    | u[366] | C(14)...C(29) | 5.2465 | 0.0496 | 0.5743 | Tied to u[28]  | 1.00 | 0.1618 | 3.1 | 0.4880 |
|    | u[234] | H(8)...H(32)  | 9.5312 | 0.0466 | 0.5747 | (fixed)        | 1.00 | -.3112 | 0.0 | 0.5747 |
| 70 | u[201] | C(7)...C(25)  | 5.2361 | 0.0496 | 0.5755 | Tied to u[28]  | 1.00 | 0.1517 | 3.1 | 0.4892 |
|    | u[284] | H(10)...C(33) | 7.1139 | 0.0484 | 0.5776 | (fixed)        | 1.00 | -.1885 | 0.4 | 0.5776 |
|    | u[112] | H(4)...C(20)  | 6.7927 | 0.0344 | 0.5791 | (fixed)        | 1.00 | -.2256 | 0.4 | 0.5791 |
|    | u[303] | C(11)...C(29) | 6.2206 | 0.0595 | 0.5813 | (fixed)        | 1.00 | -.0372 | 2.6 | 0.5813 |
|    | u[52]  | C(2)...H(21)  | 5.7628 | 0.0422 | 0.5831 | (fixed)        | 1.00 | -.0362 | 0.5 | 0.5831 |

|    |        |               |        |        |        |                |      |        |     |        |
|----|--------|---------------|--------|--------|--------|----------------|------|--------|-----|--------|
|    | u[95]  | C(3)...C(33)  | 5.1040 | 0.0274 | 0.5848 | (fixed)        | 1.00 | -.1407 | 3.2 | 0.5848 |
|    | u[451] | H(19)...C(29) | 8.2427 | 0.0649 | 0.5858 | (fixed)        | 1.00 | -.0494 | 0.3 | 0.5858 |
|    | u[364] | C(14)...C(27) | 4.8981 | 0.0644 | 0.5859 | 0.0491         | 1.00 | 0.1578 | 3.3 | 0.5847 |
|    | u[245] | C(9)...C(18)  | 6.2472 | 0.0603 | 0.5869 | Tied to u[29]  | 1.00 | 0.1118 | 2.6 | 0.5732 |
| 5  | u[79]  | C(3)...H(17)  | 7.0906 | 0.0484 | 0.5906 | (fixed)        | 1.00 | -.2097 | 0.4 | 0.5906 |
|    | u[220] | H(8)...C(18)  | 8.2249 | 0.0649 | 0.5953 | (fixed)        | 1.00 | -.0658 | 0.3 | 0.5953 |
|    | u[114] | H(4)...C(22)  | 5.5310 | 0.0339 | 0.5965 | (fixed)        | 1.00 | -.1706 | 0.5 | 0.5965 |
|    | u[403] | C(16)...C(29) | 6.2620 | 0.0604 | 0.5990 | Tied to u[29]  | 1.00 | 0.1289 | 2.6 | 0.5851 |
|    | u[203] | C(7)...C(27)  | 6.2407 | 0.0604 | 0.6005 | Tied to u[29]  | 1.00 | 0.1079 | 2.6 | 0.5866 |
| 10 | u[256] | C(9)...C(29)  | 7.0728 | 0.0669 | 0.6008 | (fixed)        | 1.00 | -.0483 | 2.3 | 0.6008 |
|    | u[349] | C(13)...H(32) | 5.7353 | 0.0422 | 0.6038 | (fixed)        | 1.00 | -.0595 | 0.5 | 0.6038 |
|    | u[206] | C(7)...H(30)  | 8.2126 | 0.0649 | 0.6073 | (fixed)        | 1.00 | -.0764 | 0.3 | 0.6073 |
|    | u[155] | C(5)...H(34)  | 6.7594 | 0.0344 | 0.6077 | (fixed)        | 1.00 | -.2541 | 0.4 | 0.6077 |
|    | u[437] | C(18)...H(30) | 8.2252 | 0.0617 | 0.6106 | (fixed)        | 1.00 | -.0561 | 0.3 | 0.6106 |
| 15 | u[299] | C(11)...C(25) | 3.9891 | 0.0653 | 0.6112 | Tied to u[382] | 1.00 | 0.1399 | 4.1 | 0.5799 |
|    | u[432] | C(18)...C(25) | 6.2279 | 0.0595 | 0.6136 | (fixed)        | 1.00 | -.0237 | 2.6 | 0.6136 |
|    | u[290] | C(11)...C(16) | 4.8712 | 0.0645 | 0.6156 | Tied to u[364] | 1.00 | 0.1383 | 3.4 | 0.6143 |
|    | u[500] | H(23)...H(28) | 7.5660 | 0.0403 | 0.6174 | (fixed)        | 1.00 | -.2755 | 0.1 | 0.6174 |
| 20 | u[96]  | C(3)...H(34)  | 5.4965 | 0.0339 | 0.6180 | (fixed)        | 1.00 | -.2006 | 0.5 | 0.6180 |
|    | u[195] | C(7)...H(19)  | 8.2112 | 0.0617 | 0.6198 | (fixed)        | 1.00 | -.0688 | 0.3 | 0.6198 |
|    | u[304] | C(11)...H(30) | 7.1512 | 0.0658 | 0.6238 | (fixed)        | 1.00 | -.0516 | 0.4 | 0.6238 |
|    | u[190] | C(7)...C(14)  | 6.1853 | 0.0596 | 0.6250 | (fixed)        | 1.00 | -.0641 | 2.6 | 0.6250 |
|    | u[294] | C(11)...C(20) | 4.7372 | 0.0560 | 0.6267 | Tied to u[485] | 1.00 | 0.1206 | 3.5 | 0.6129 |
|    | u[173] | H(6)...C(24)  | 5.7311 | 0.0423 | 0.6277 | (fixed)        | 1.00 | -.0587 | 0.5 | 0.6277 |
| 25 | u[469] | C(20)...C(33) | 6.0479 | 0.0315 | 0.6287 | 0.0589         | 1.00 | -.1406 | 2.7 | 0.6278 |
|    | u[467] | C(20)...C(31) | 7.1129 | 0.0368 | 0.6293 | (fixed)        | 1.00 | -.1704 | 2.3 | 0.6293 |
|    | u[231] | H(8)...C(29)  | 8.1980 | 0.0617 | 0.6309 | (fixed)        | 1.00 | -.0803 | 0.3 | 0.6309 |
|    | u[434] | C(18)...C(27) | 7.0860 | 0.0669 | 0.6313 | (fixed)        | 1.00 | -.0299 | 2.3 | 0.6313 |
|    | u[362] | C(14)...C(25) | 3.9728 | 0.0654 | 0.6315 | Tied to u[382] | 1.00 | 0.1300 | 4.1 | 0.5992 |
| 30 | u[301] | C(11)...C(27) | 5.2070 | 0.0698 | 0.6339 | (fixed)        | 1.00 | 0.0916 | 3.1 | 0.6339 |
|    | u[489] | C(22)...H(28) | 7.1166 | 0.0485 | 0.6375 | (fixed)        | 1.00 | -.1759 | 0.4 | 0.6375 |
|    | u[141] | C(5)...C(20)  | 7.1365 | 0.0368 | 0.6458 | (fixed)        | 1.00 | -.1439 | 2.3 | 0.6458 |
|    | u[143] | C(5)...C(22)  | 6.0753 | 0.0315 | 0.6468 | Tied to u[469] | 1.00 | -.1095 | 2.7 | 0.6458 |
|    | u[314] | H(12)...C(18) | 4.4229 | 0.0561 | 0.6497 | Tied to u[385] | 1.00 | 0.3959 | 0.6 | 0.6478 |
| 35 | u[288] | C(11)...C(14) | 3.9443 | 0.0655 | 0.6537 | Tied to u[382] | 1.00 | 0.1088 | 4.1 | 0.6203 |
|    | u[447] | H(19)...C(25) | 7.1615 | 0.0658 | 0.6578 | (fixed)        | 1.00 | -.0353 | 0.4 | 0.6578 |
|    | u[399] | C(16)...C(25) | 5.2029 | 0.0699 | 0.6589 | (fixed)        | 1.00 | 0.0938 | 3.1 | 0.6589 |
|    | u[482] | H(21)...C(33) | 6.9847 | 0.0305 | 0.6594 | (fixed)        | 1.00 | -.1991 | 0.4 | 0.6594 |
|    | u[192] | C(7)...C(16)  | 7.0415 | 0.0670 | 0.6610 | (fixed)        | 1.00 | -.0690 | 2.3 | 0.6610 |
| 40 | u[254] | C(9)...C(27)  | 5.9565 | 0.0751 | 0.6615 | (fixed)        | 1.00 | 0.1148 | 2.7 | 0.6615 |
|    | u[368] | C(14)...C(31) | 4.7300 | 0.0561 | 0.6638 | Tied to u[485] | 1.00 | 0.1236 | 3.5 | 0.6493 |
|    | u[246] | C(9)...H(19)  | 7.0168 | 0.0657 | 0.6649 | (fixed)        | 1.00 | 0.1083 | 0.4 | 0.6649 |
|    | u[257] | C(9)...H(30)  | 7.9168 | 0.0762 | 0.6663 | (fixed)        | 1.00 | -.0635 | 0.3 | 0.6663 |
|    | u[480] | H(21)...C(31) | 8.0631 | 0.0358 | 0.6687 | (fixed)        | 1.00 | -.2481 | 0.3 | 0.6687 |
| 45 | u[216] | H(8)...C(14)  | 7.1137 | 0.0658 | 0.6717 | (fixed)        | 1.00 | -.0806 | 0.4 | 0.6717 |
|    | u[296] | C(11)...C(22) | 3.7700 | 0.0583 | 0.6727 | Tied to u[382] | 1.00 | 0.0829 | 4.3 | 0.6383 |
|    | u[404] | C(16)...H(30) | 7.0322 | 0.0657 | 0.6758 | (fixed)        | 1.00 | 0.1258 | 0.4 | 0.6758 |
|    | u[229] | H(8)...C(27)  | 7.0091 | 0.0657 | 0.6777 | (fixed)        | 1.00 | 0.1031 | 0.4 | 0.6777 |
|    | u[385] | H(15)...C(29) | 4.4299 | 0.0562 | 0.6791 | 0.0677         | 1.00 | 0.4124 | 0.6 | 0.6772 |
| 50 | u[198] | C(7)...C(22)  | 6.0298 | 0.0446 | 0.6808 | (fixed)        | 1.00 | -.0425 | 2.7 | 0.6808 |
|    | u[107] | H(4)...H(15)  | 5.4764 | 0.0332 | 0.6816 | (fixed)        | 1.00 | -.2274 | 0.1 | 0.6816 |
|    | u[315] | H(12)...H(19) | 5.2818 | 0.0575 | 0.6846 | (fixed)        | 1.00 | 0.3868 | 0.1 | 0.6846 |
|    | u[93]  | C(3)...C(31)  | 6.0324 | 0.0315 | 0.6849 | Tied to u[469] | 1.00 | -.1443 | 2.7 | 0.6839 |
|    | u[241] | C(9)...C(14)  | 5.1607 | 0.0700 | 0.6862 | (fixed)        | 1.00 | 0.0586 | 3.2 | 0.6862 |
| 55 | u[202] | C(7)...H(26)  | 4.4173 | 0.0563 | 0.6871 | Tied to u[385] | 1.00 | 0.4025 | 0.6 | 0.6852 |
|    | u[401] | C(16)...C(27) | 5.9584 | 0.0752 | 0.6888 | (fixed)        | 1.00 | 0.1229 | 2.7 | 0.6888 |
|    | u[440] | C(18)...C(33) | 6.0105 | 0.0446 | 0.6910 | (fixed)        | 1.00 | -.0595 | 2.7 | 0.6910 |
|    | u[370] | C(14)...C(33) | 3.7680 | 0.0585 | 0.6933 | Tied to u[382] | 1.00 | 0.0883 | 4.3 | 0.6578 |
|    | u[146] | C(5)...C(25)  | 4.6979 | 0.0562 | 0.6955 | Tied to u[485] | 1.00 | 0.1006 | 3.5 | 0.6801 |
| 60 | u[46]  | C(2)...H(15)  | 4.0249 | 0.0548 | 0.6968 | Tied to u[363] | 1.00 | -.0581 | 0.7 | 0.6970 |
|    | u[171] | H(6)...C(22)  | 7.0187 | 0.0305 | 0.6978 | (fixed)        | 1.00 | -.1579 | 0.4 | 0.6978 |
|    | u[196] | C(7)...C(20)  | 6.9118 | 0.0502 | 0.6988 | (fixed)        | 1.00 | -.0473 | 2.4 | 0.6988 |
|    | u[449] | H(19)...C(27) | 7.9340 | 0.0762 | 0.6990 | (fixed)        | 1.00 | -.0408 | 0.3 | 0.6990 |
|    | u[152] | C(5)...C(31)  | 7.0915 | 0.0369 | 0.6994 | (fixed)        | 1.00 | -.1791 | 2.3 | 0.6994 |
| 65 | u[452] | H(19)...H(30) | 8.9726 | 0.0733 | 0.7009 | (fixed)        | 1.00 | -.0664 | 0.1 | 0.7009 |
|    | u[249] | C(9)...C(22)  | 4.9930 | 0.0596 | 0.7011 | Tied to u[407] | 1.00 | 0.0500 | 3.3 | 0.7026 |
|    | u[386] | H(15)...H(30) | 5.2903 | 0.0576 | 0.7084 | (fixed)        | 1.00 | 0.4019 | 0.1 | 0.7084 |
|    | u[221] | H(8)...H(19)  | 8.9531 | 0.0733 | 0.7118 | (fixed)        | 1.00 | -.0842 | 0.1 | 0.7118 |
|    | u[169] | H(6)...C(20)  | 8.0909 | 0.0358 | 0.7126 | (fixed)        | 1.00 | -.2131 | 0.3 | 0.7126 |
| 70 | u[320] | H(12)...C(24) | 4.0504 | 0.0548 | 0.7136 | Tied to u[363] | 1.00 | -.0270 | 0.7 | 0.7137 |
|    | u[228] | H(8)...H(26)  | 5.2787 | 0.0576 | 0.7186 | (fixed)        | 1.00 | 0.3932 | 0.1 | 0.7186 |
|    | u[330] | H(12)...H(34) | 5.4958 | 0.0333 | 0.7190 | (fixed)        | 1.00 | -.1990 | 0.1 | 0.7190 |
|    | u[438] | C(18)...C(31) | 6.8925 | 0.0502 | 0.7215 | (fixed)        | 1.00 | -.0620 | 2.4 | 0.7215 |
|    | u[247] | C(9)...C(20)  | 5.7765 | 0.0627 | 0.7220 | (fixed)        | 1.00 | 0.0833 | 2.8 | 0.7220 |



|    |        |          |       |        |        |        |                |      |         |     |        |
|----|--------|----------|-------|--------|--------|--------|----------------|------|---------|-----|--------|
|    | u[232] | H(8)...  | H(30) | 8.9386 | 0.0733 | 0.7245 | (fixed)        | 1.00 | -0.0967 | 0.1 | 0.7245 |
|    | u[87]  | C(3)...  | C(25) | 3.7313 | 0.0586 | 0.7265 | Tied to u[382] | 1.00 | 0.0640  | 4.4 | 0.6894 |
|    | u[407] | C(16)... | C(33) | 4.9862 | 0.0597 | 0.7271 | 0.0785         | 1.00 | 0.0506  | 3.3 | 0.7286 |
|    | u[243] | C(9)...  | C(16) | 5.9130 | 0.0753 | 0.7279 | (fixed)        | 1.00 | 0.0869  | 2.8 | 0.7279 |
| 5  | u[269] | H(10)... | C(18) | 6.2711 | 0.0778 | 0.7297 | (fixed)        | 1.00 | 0.2381  | 0.4 | 0.7297 |
|    | u[224] | H(8)...  | C(22) | 6.9568 | 0.0495 | 0.7301 | (fixed)        | 1.00 | -0.0564 | 0.4 | 0.7301 |
|    | u[218] | H(8)...  | C(16) | 7.8823 | 0.0763 | 0.7320 | (fixed)        | 1.00 | -0.0866 | 0.3 | 0.7320 |
|    | u[94]  | C(3)...  | H(32) | 6.9720 | 0.0306 | 0.7326 | (fixed)        | 1.00 | -0.1977 | 0.4 | 0.7326 |
|    | u[302] | C(11)... | H(28) | 5.5366 | 0.0842 | 0.7335 | (fixed)        | 1.00 | 0.1793  | 0.5 | 0.7335 |
| 10 | u[91]  | C(3)...  | C(29) | 5.9846 | 0.0446 | 0.7336 | (fixed)        | 1.00 | -0.0755 | 2.7 | 0.7336 |
|    | u[493] | C(22)... | H(32) | 6.8859 | 0.0370 | 0.7346 | (fixed)        | 1.00 | -0.2017 | 0.4 | 0.7346 |
|    | u[343] | C(13)... | H(26) | 4.0376 | 0.0549 | 0.7365 | Tied to u[363] | 1.00 | -0.0318 | 0.7 | 0.7367 |
|    | u[504] | H(23)... | H(32) | 7.3557 | 0.0408 | 0.7369 | (fixed)        | 1.00 | -0.2937 | 0.1 | 0.7369 |
|    | u[455] | H(19)... | C(33) | 6.9379 | 0.0495 | 0.7401 | (fixed)        | 1.00 | -0.0732 | 0.4 | 0.7401 |
| 15 | u[77]  | C(3)...  | H(15) | 5.1419 | 0.0430 | 0.7417 | (fixed)        | 1.00 | -0.1691 | 0.5 | 0.7417 |
|    | u[282] | H(10)... | C(31) | 7.8739 | 0.0625 | 0.7422 | (fixed)        | 1.00 | -0.1908 | 0.3 | 0.7422 |
|    | u[204] | C(7)...  | H(28) | 6.2638 | 0.0778 | 0.7512 | (fixed)        | 1.00 | 0.2360  | 0.4 | 0.7512 |
|    | u[83]  | C(3)...  | H(21) | 6.9257 | 0.0370 | 0.7547 | (fixed)        | 1.00 | -0.1577 | 0.4 | 0.7547 |
|    | u[420] | H(17)... | C(29) | 6.2897 | 0.0778 | 0.7559 | (fixed)        | 1.00 | 0.2630  | 0.4 | 0.7559 |
| 20 | u[89]  | C(3)...  | C(27) | 4.9498 | 0.0598 | 0.7603 | Tied to u[407] | 1.00 | 0.0240  | 3.3 | 0.7619 |
|    | u[283] | H(10)... | H(32) | 8.8099 | 0.0609 | 0.7611 | (fixed)        | 1.00 | -0.2795 | 0.1 | 0.7611 |
|    | u[416] | H(17)... | C(25) | 5.5238 | 0.0844 | 0.7624 | (fixed)        | 1.00 | 0.1744  | 0.5 | 0.7624 |
|    | u[153] | C(5)...  | H(32) | 8.0417 | 0.0359 | 0.7631 | (fixed)        | 1.00 | -0.2533 | 0.3 | 0.7631 |
|    | u[405] | C(16)... | C(31) | 5.7649 | 0.0628 | 0.7685 | (fixed)        | 1.00 | 0.0837  | 2.8 | 0.7685 |
| 25 | u[253] | C(9)...  | H(26) | 4.1379 | 0.0766 | 0.7687 | Tied to u[382] | 1.00 | 0.4293  | 0.7 | 0.7294 |
|    | u[329] | H(12)... | C(33) | 5.1671 | 0.0430 | 0.7696 | (fixed)        | 1.00 | -0.1361 | 0.5 | 0.7696 |
|    | u[150] | C(5)...  | C(29) | 6.8608 | 0.0503 | 0.7717 | (fixed)        | 1.00 | -0.0830 | 2.4 | 0.7717 |
|    | u[222] | H(8)...  | C(20) | 7.7465 | 0.0575 | 0.7739 | (fixed)        | 1.00 | -0.0623 | 0.4 | 0.7739 |
|    | u[138] | C(5)...  | H(17) | 7.8380 | 0.0625 | 0.7757 | (fixed)        | 1.00 | -0.2204 | 0.3 | 0.7757 |
| 30 | u[276] | H(10)... | C(25) | 5.5590 | 0.0810 | 0.7774 | (fixed)        | 1.00 | 0.1503  | 0.5 | 0.7774 |
|    | u[166] | H(6)...  | H(17) | 8.7773 | 0.0609 | 0.7836 | (fixed)        | 1.00 | -0.3083 | 0.1 | 0.7836 |
|    | u[92]  | C(3)...  | H(30) | 6.9093 | 0.0496 | 0.7868 | (fixed)        | 1.00 | -0.0918 | 0.4 | 0.7868 |
|    | u[265] | H(10)... | C(14) | 5.4832 | 0.0845 | 0.7905 | (fixed)        | 1.00 | 0.1418  | 0.5 | 0.7905 |
|    | u[365] | C(14)... | H(28) | 5.5427 | 0.0811 | 0.7924 | (fixed)        | 1.00 | 0.1383  | 0.5 | 0.7924 |
| 35 | u[113] | H(4)...  | H(21) | 7.4004 | 0.0408 | 0.7947 | (fixed)        | 1.00 | -0.2376 | 0.1 | 0.7947 |
|    | u[312] | H(12)... | C(16) | 4.0883 | 0.0768 | 0.7949 | Tied to u[382] | 1.00 | 0.3903  | 0.7 | 0.7542 |
|    | u[453] | H(19)... | C(31) | 7.7282 | 0.0576 | 0.7967 | (fixed)        | 1.00 | -0.0761 | 0.4 | 0.7967 |
|    | u[383] | H(15)... | C(27) | 4.0876 | 0.0768 | 0.7998 | Tied to u[382] | 1.00 | 0.3916  | 0.7 | 0.7589 |
|    | u[182] | H(6)...  | C(33) | 6.8781 | 0.0371 | 0.8005 | (fixed)        | 1.00 | -0.1954 | 0.4 | 0.8005 |
| 40 | u[148] | C(5)...  | C(27) | 5.7256 | 0.0629 | 0.8027 | (fixed)        | 1.00 | 0.0537  | 2.9 | 0.8027 |
|    | u[464] | C(20)... | H(28) | 7.8830 | 0.0625 | 0.8028 | (fixed)        | 1.00 | -0.1701 | 0.3 | 0.8028 |
|    | u[273] | H(10)... | C(22) | 5.2972 | 0.0778 | 0.8037 | (fixed)        | 1.00 | 0.1075  | 0.5 | 0.8037 |
|    | u[498] | H(23)... | H(26) | 5.4841 | 0.0334 | 0.8055 | (fixed)        | 1.00 | -0.1879 | 0.1 | 0.8055 |
|    | u[255] | C(9)...  | H(28) | 6.0747 | 0.0929 | 0.8075 | (fixed)        | 1.00 | 0.2383  | 0.4 | 0.8075 |
| 45 | u[351] | C(13)... | H(34) | 3.6841 | 0.0506 | 0.8231 | Tied to u[382] | 1.00 | -0.0687 | 0.7 | 0.7810 |
|    | u[487] | C(22)... | H(26) | 5.1589 | 0.0432 | 0.8284 | (fixed)        | 1.00 | -0.1270 | 0.5 | 0.8284 |
|    | u[183] | H(6)...  | H(34) | 7.3550 | 0.0409 | 0.8301 | (fixed)        | 1.00 | -0.2755 | 0.1 | 0.8301 |
|    | u[54]  | C(2)...  | H(23) | 3.7051 | 0.0507 | 0.8316 | Tied to u[382] | 1.00 | -0.0441 | 0.7 | 0.7891 |
|    | u[291] | C(11)... | H(17) | 5.5073 | 0.0812 | 0.8319 | (fixed)        | 1.00 | 0.1145  | 0.5 | 0.8319 |
| 50 | u[424] | H(17)... | C(33) | 5.3021 | 0.0779 | 0.8330 | (fixed)        | 1.00 | 0.1214  | 0.5 | 0.8330 |
|    | u[295] | C(11)... | H(21) | 5.3028 | 0.0728 | 0.8345 | (fixed)        | 1.00 | 0.0866  | 0.5 | 0.8345 |
|    | u[116] | H(4)...  | C(24) | 3.6769 | 0.0507 | 0.8400 | Tied to u[382] | 1.00 | -0.0688 | 0.7 | 0.7970 |
|    | u[418] | H(17)... | C(27) | 6.0673 | 0.0930 | 0.8429 | (fixed)        | 1.00 | 0.2408  | 0.4 | 0.8429 |
|    | u[270] | H(10)... | H(19) | 6.9189 | 0.0841 | 0.8438 | (fixed)        | 1.00 | 0.2512  | 0.1 | 0.8438 |
| 55 | u[477] | H(21)... | H(28) | 8.8200 | 0.0610 | 0.8456 | (fixed)        | 1.00 | -0.2546 | 0.1 | 0.8456 |
|    | u[151] | C(5)...  | H(30) | 7.6910 | 0.0576 | 0.8528 | (fixed)        | 1.00 | -0.1016 | 0.4 | 0.8528 |
|    | u[316] | H(12)... | C(20) | 3.8667 | 0.0767 | 0.8582 | Tied to u[382] | 1.00 | 0.2926  | 0.7 | 0.8143 |
|    | u[369] | C(14)... | H(32) | 5.2957 | 0.0729 | 0.8632 | (fixed)        | 1.00 | 0.0886  | 0.5 | 0.8632 |
|    | u[230] | H(8)...  | H(28) | 6.9102 | 0.0842 | 0.8653 | (fixed)        | 1.00 | 0.2479  | 0.1 | 0.8653 |
| 60 | u[421] | H(17)... | H(30) | 6.9389 | 0.0842 | 0.8698 | (fixed)        | 1.00 | 0.2777  | 0.1 | 0.8698 |
|    | u[387] | H(15)... | C(31) | 3.8977 | 0.0769 | 0.8703 | Tied to u[382] | 1.00 | 0.3291  | 0.7 | 0.8258 |
|    | u[90]  | C(3)...  | H(28) | 5.2515 | 0.0781 | 0.8708 | (fixed)        | 1.00 | 0.0829  | 0.5 | 0.8708 |
|    | u[271] | H(10)... | C(20) | 5.8588 | 0.0841 | 0.8712 | (fixed)        | 1.00 | 0.1747  | 0.5 | 0.8712 |
|    | u[267] | H(10)... | C(16) | 6.0193 | 0.0932 | 0.8771 | (fixed)        | 1.00 | 0.2027  | 0.5 | 0.8771 |
| 65 | u[280] | H(10)... | C(29) | 7.6110 | 0.0851 | 0.8900 | (fixed)        | 1.00 | -0.0697 | 0.4 | 0.8900 |
|    | u[136] | C(5)...  | H(15) | 6.0753 | 0.0558 | 0.8947 | (fixed)        | 1.00 | -0.1806 | 0.4 | 0.8947 |
|    | u[506] | H(23)... | H(34) | 5.1361 | 0.0514 | 0.8991 | (fixed)        | 1.00 | -0.2146 | 0.1 | 0.8991 |
|    | u[174] | H(6)...  | C(25) | 5.2549 | 0.0731 | 0.9030 | (fixed)        | 1.00 | 0.0609  | 0.5 | 0.9030 |
|    | u[164] | H(6)...  | H(15) | 6.9753 | 0.0515 | 0.9092 | (fixed)        | 1.00 | -0.2349 | 0.1 | 0.9092 |
| 70 | u[327] | H(12)... | C(31) | 6.1112 | 0.0558 | 0.9130 | (fixed)        | 1.00 | -0.1395 | 0.4 | 0.9130 |
|    | u[277] | H(10)... | H(26) | 4.8106 | 0.0963 | 0.9153 | (fixed)        | 1.00 | 0.4039  | 0.1 | 0.9153 |
|    | u[468] | C(20)... | H(32) | 7.5965 | 0.0448 | 0.9166 | (fixed)        | 1.00 | -0.2088 | 0.4 | 0.9166 |
|    | u[422] | H(17)... | C(31) | 5.8556 | 0.0843 | 0.9255 | (fixed)        | 1.00 | 0.1883  | 0.5 | 0.9255 |
|    | u[435] | C(18)... | H(28) | 7.6202 | 0.0852 | 0.9292 | (fixed)        | 1.00 | -0.0513 | 0.4 | 0.9292 |

|    |        |               |        |        |        |                |      |         |     |        |
|----|--------|---------------|--------|--------|--------|----------------|------|---------|-----|--------|
|    | u[300] | C(11)...H(26) | 3.2665 | 0.0843 | 0.9308 | Tied to u[389] | 1.00 | 0.3647  | 0.8 | 0.7455 |
|    | u[384] | H(15)...H(28) | 4.7459 | 0.0964 | 0.9323 | (fixed)        | 1.00 | 0.3461  | 0.1 | 0.9323 |
|    | u[328] | H(12)...H(32) | 7.0105 | 0.0515 | 0.9329 | (fixed)        | 1.00 | -0.1938 | 0.1 | 0.9329 |
|    | u[142] | C(5)...H(21)  | 7.6375 | 0.0448 | 0.9333 | (fixed)        | 1.00 | -0.1639 | 0.4 | 0.9333 |
| 5  | u[147] | C(5)...H(26)  | 3.8185 | 0.0775 | 0.9366 | Tied to u[382] | 1.00 | 0.2817  | 0.7 | 0.8887 |
|    | u[278] | H(10)...C(27) | 6.4944 | 0.0956 | 0.9447 | (fixed)        | 1.00 | 0.1010  | 0.4 | 0.9447 |
|    | u[115] | H(4)...H(23)  | 5.1930 | 0.0515 | 0.9458 | (fixed)        | 1.00 | -0.1420 | 0.1 | 0.9458 |
|    | u[313] | H(12)...H(17) | 4.7473 | 0.0966 | 0.9506 | (fixed)        | 1.00 | 0.3550  | 0.1 | 0.9506 |
|    | u[193] | C(7)...H(17)  | 7.5580 | 0.0853 | 0.9533 | (fixed)        | 1.00 | -0.1077 | 0.4 | 0.9533 |
| 10 | u[310] | H(12)...C(14) | 3.2048 | 0.0847 | 0.9547 | Tied to u[389] | 1.00 | 0.3172  | 0.9 | 0.7647 |
|    | u[381] | H(15)...C(25) | 3.2001 | 0.0847 | 0.9575 | Tied to u[389] | 1.00 | 0.3141  | 0.9 | 0.7669 |
|    | u[126] | H(4)...H(34)  | 5.1416 | 0.0516 | 0.9625 | (fixed)        | 1.00 | -0.1876 | 0.1 | 0.9625 |
|    | u[149] | C(5)...H(28)  | 5.7987 | 0.0845 | 0.9634 | (fixed)        | 1.00 | 0.1437  | 0.5 | 0.9634 |
| 15 | u[289] | C(11)...H(15) | 3.9768 | 0.0914 | 0.9641 | Tied to u[363] | 1.00 | 0.0341  | 0.7 | 0.9642 |
|    | u[363] | C(14)...H(26) | 3.9971 | 0.0914 | 0.9649 | 0.0885         | 1.00 | 0.0547  | 0.7 | 0.9651 |
|    | u[321] | H(12)...C(25) | 4.0173 | 0.0915 | 0.9664 | Tied to u[363] | 1.00 | 0.0756  | 0.7 | 0.9666 |
|    | u[462] | C(20)...H(26) | 6.1097 | 0.0560 | 0.9681 | (fixed)        | 1.00 | -0.1248 | 0.4 | 0.9681 |
|    | u[402] | C(16)...H(28) | 6.4897 | 0.0957 | 0.9693 | (fixed)        | 1.00 | 0.1035  | 0.4 | 0.9693 |
| 20 | u[481] | H(21)...H(32) | 8.5207 | 0.0435 | 0.9805 | (fixed)        | 1.00 | -0.2932 | 0.1 | 0.9805 |
|    | u[281] | H(10)...H(30) | 8.4007 | 0.0962 | 0.9865 | (fixed)        | 1.00 | -0.0866 | 0.1 | 0.9865 |
|    | u[180] | H(6)...C(31)  | 7.5722 | 0.0449 | 0.9968 | (fixed)        | 1.00 | -0.2137 | 0.4 | 0.9968 |
|    | u[475] | H(21)...H(26) | 7.0110 | 0.0517 | 1.0058 | (fixed)        | 1.00 | -0.1740 | 0.1 | 1.0058 |
|    | u[388] | H(15)...H(32) | 4.4903 | 0.0985 | 1.0079 | (fixed)        | 1.00 | 0.2663  | 0.1 | 1.0079 |
| 25 | u[197] | C(7)...H(21)  | 7.3405 | 0.0633 | 1.0135 | (fixed)        | 1.00 | -0.0728 | 0.4 | 1.0135 |
|    | u[325] | H(12)...C(29) | 6.1402 | 0.0788 | 1.0162 | (fixed)        | 1.00 | -0.0677 | 0.4 | 1.0162 |
|    | u[244] | C(9)...H(17)  | 6.4278 | 0.0960 | 1.0172 | (fixed)        | 1.00 | 0.0562  | 0.4 | 1.0172 |
|    | u[191] | C(7)...H(15)  | 6.0929 | 0.0788 | 1.0174 | (fixed)        | 1.00 | -0.1146 | 0.4 | 1.0174 |
|    | u[248] | C(9)...H(21)  | 6.2028 | 0.0819 | 1.0183 | (fixed)        | 1.00 | 0.0493  | 0.4 | 1.0183 |
| 30 | u[317] | H(12)...H(21) | 4.4379 | 0.0986 | 1.0219 | (fixed)        | 1.00 | 0.2203  | 0.1 | 1.0219 |
|    | u[170] | H(6)...H(21)  | 8.5671 | 0.0435 | 1.0286 | (fixed)        | 1.00 | -0.2359 | 0.1 | 1.0286 |
|    | u[450] | H(19)...H(28) | 8.4136 | 0.0963 | 1.0298 | (fixed)        | 1.00 | -0.0635 | 0.1 | 1.0298 |
|    | u[389] | H(15)...C(33) | 2.9544 | 0.0872 | 1.0301 | 0.0298         | 1.00 | 0.2406  | 0.9 | 0.8250 |
|    | u[439] | C(18)...H(32) | 7.3045 | 0.0633 | 1.0359 | (fixed)        | 1.00 | -0.1028 | 0.4 | 1.0359 |
| 35 | u[318] | H(12)...C(22) | 2.9063 | 0.0873 | 1.0376 | Tied to u[389] | 1.00 | 0.1976  | 0.9 | 0.8311 |
|    | u[433] | C(18)...H(26) | 6.1391 | 0.0789 | 1.0481 | (fixed)        | 1.00 | -0.0584 | 0.4 | 1.0481 |
|    | u[470] | C(20)...H(34) | 5.6996 | 0.0463 | 1.0485 | (fixed)        | 1.00 | -0.1742 | 0.5 | 1.0485 |
|    | u[371] | C(14)...H(34) | 3.6098 | 0.0886 | 1.0570 | Tied to u[382] | 1.00 | -0.0051 | 0.8 | 1.0029 |
|    | u[219] | H(8)...H(17)  | 8.3408 | 0.0964 | 1.0580 | (fixed)        | 1.00 | -0.1295 | 0.1 | 1.0580 |
| 40 | u[406] | C(16)...H(32) | 6.1828 | 0.0820 | 1.0597 | (fixed)        | 1.00 | 0.0430  | 0.4 | 1.0597 |
|    | u[323] | H(12)...C(27) | 5.1906 | 0.0962 | 1.0626 | (fixed)        | 1.00 | 0.0345  | 0.5 | 1.0626 |
|    | u[495] | C(22)...H(34) | 4.7255 | 0.0406 | 1.0628 | Tied to u[28]  | 1.00 | -0.1641 | 0.6 | 0.9029 |
|    | u[242] | C(9)...H(15)  | 5.1386 | 0.0962 | 1.0720 | (fixed)        | 1.00 | -0.0138 | 0.5 | 1.0720 |
|    | u[400] | C(16)...H(26) | 5.1794 | 0.0962 | 1.0731 | (fixed)        | 1.00 | 0.0275  | 0.5 | 1.0731 |
| 45 | u[326] | H(12)...H(30) | 7.0711 | 0.0848 | 1.0735 | (fixed)        | 1.00 | -0.0809 | 0.1 | 1.0735 |
|    | u[217] | H(8)...H(15)  | 7.0179 | 0.0848 | 1.0808 | (fixed)        | 1.00 | -0.1319 | 0.1 | 1.0808 |
|    | u[144] | C(5)...H(23)  | 5.7432 | 0.0464 | 1.0837 | (fixed)        | 1.00 | -0.1182 | 0.5 | 1.0837 |
|    | u[297] | C(11)...H(23) | 3.5820 | 0.0889 | 1.0842 | Tied to u[382] | 1.00 | -0.0180 | 0.8 | 1.0288 |
|    | u[117] | H(4)...C(25)  | 3.5660 | 0.0890 | 1.0861 | Tied to u[382] | 1.00 | -0.0329 | 0.8 | 1.0305 |
| 50 | u[175] | H(6)...H(26)  | 4.3973 | 0.0993 | 1.0863 | (fixed)        | 1.00 | 0.2102  | 0.1 | 1.0863 |
|    | u[181] | H(6)...H(32)  | 8.4955 | 0.0436 | 1.0895 | (fixed)        | 1.00 | -0.2931 | 0.1 | 1.0895 |
|    | u[178] | H(6)...C(29)  | 7.2659 | 0.0635 | 1.0964 | (fixed)        | 1.00 | -0.1243 | 0.4 | 1.0964 |
|    | u[483] | H(21)...H(34) | 6.5951 | 0.0422 | 1.0979 | (fixed)        | 1.00 | -0.2217 | 0.1 | 1.0979 |
|    | u[123] | H(4)...C(31)  | 5.6869 | 0.0465 | 1.0982 | (fixed)        | 1.00 | -0.1693 | 0.5 | 1.0982 |
| 55 | u[85]  | C(3)...H(23)  | 4.7655 | 0.0407 | 1.0983 | Tied to u[28]  | 1.00 | -0.1091 | 0.6 | 0.9331 |
|    | u[176] | H(6)...C(27)  | 6.1325 | 0.0822 | 1.1044 | (fixed)        | 1.00 | 0.0080  | 0.4 | 1.1044 |
|    | u[448] | H(19)...H(26) | 7.0732 | 0.0849 | 1.1071 | (fixed)        | 1.00 | -0.0687 | 0.1 | 1.1071 |
|    | u[88]  | C(3)...H(26)  | 2.8515 | 0.0886 | 1.1074 | Tied to u[389] | 1.00 | 0.1917  | 1.0 | 0.8869 |
|    | u[125] | H(4)...C(33)  | 4.7165 | 0.0407 | 1.1133 | Tied to u[28]  | 1.00 | -0.1516 | 0.6 | 0.9460 |
| 60 | u[441] | C(18)...H(34) | 5.7231 | 0.0647 | 1.1206 | (fixed)        | 1.00 | -0.1192 | 0.5 | 1.1206 |
|    | u[223] | H(8)...H(21)  | 8.1089 | 0.0711 | 1.1256 | (fixed)        | 1.00 | -0.0902 | 0.1 | 1.1256 |
|    | u[279] | H(10)...H(28) | 6.5228 | 0.1190 | 1.1291 | (fixed)        | 1.00 | 0.2303  | 0.1 | 1.1291 |
|    | u[199] | C(7)...H(23)  | 5.7477 | 0.0648 | 1.1425 | (fixed)        | 1.00 | -0.0864 | 0.5 | 1.1425 |
|    | u[172] | H(6)...H(23)  | 6.6535 | 0.0423 | 1.1472 | (fixed)        | 1.00 | -0.1474 | 0.1 | 1.1472 |
| 65 | u[454] | H(19)...H(32) | 8.0715 | 0.0712 | 1.1479 | (fixed)        | 1.00 | -0.1216 | 0.1 | 1.1479 |
|    | u[419] | H(17)...H(28) | 6.5040 | 0.1192 | 1.1574 | (fixed)        | 1.00 | 0.2215  | 0.1 | 1.1574 |
|    | u[121] | H(4)...C(29)  | 5.6963 | 0.0648 | 1.1584 | (fixed)        | 1.00 | -0.1317 | 0.5 | 1.1584 |
|    | u[382] | H(15)...H(26) | 3.3381 | 0.1177 | 1.1591 | 0.0865         | 1.00 | 0.1467  | 0.1 | 1.0998 |
|    | u[124] | H(4)...H(32)  | 6.5877 | 0.0423 | 1.1632 | (fixed)        | 1.00 | -0.2080 | 0.1 | 1.1632 |
| 70 | u[324] | H(12)...H(28) | 5.5608 | 0.1138 | 1.1711 | (fixed)        | 1.00 | 0.1028  | 0.1 | 1.1711 |
|    | u[311] | H(12)...H(15) | 3.3523 | 0.1180 | 1.1740 | Tied to u[382] | 1.00 | 0.1706  | 0.1 | 1.1139 |
|    | u[417] | H(17)...H(26) | 5.5404 | 0.1138 | 1.1750 | (fixed)        | 1.00 | 0.0840  | 0.1 | 1.1750 |
|    | u[456] | H(19)...H(34) | 6.6497 | 0.0680 | 1.1860 | (fixed)        | 1.00 | -0.1337 | 0.1 | 1.1860 |
|    | u[266] | H(10)...H(15) | 5.5006 | 0.1139 | 1.1892 | (fixed)        | 1.00 | 0.0501  | 0.1 | 1.1892 |
|    | u[322] | H(12)...H(26) | 3.3824 | 0.1185 | 1.1985 | Tied to u[382] | 1.00 | 0.2170  | 0.1 | 1.1372 |

---

|    |        |          |       |        |        |        |                |      |        |     |        |
|----|--------|----------|-------|--------|--------|--------|----------------|------|--------|-----|--------|
|    | u[272] | H(10)... | H(21) | 6.1710 | 0.1089 | 1.2063 | (fixed)        | 1.00 | 0.1279 | 0.1 | 1.2063 |
|    | u[225] | H(8)...  | H(23) | 6.6783 | 0.0680 | 1.2074 | (fixed)        | 1.00 | -.0978 | 0.1 | 1.2074 |
|    | u[268] | H(10)... | H(17) | 6.4374 | 0.1195 | 1.2097 | (fixed)        | 1.00 | 0.1739 | 0.1 | 1.2097 |
|    | u[179] | H(6)...  | H(30) | 8.0249 | 0.0713 | 1.2166 | (fixed)        | 1.00 | -.1487 | 0.1 | 1.2166 |
| 5  | u[425] | H(17)... | H(34) | 5.1639 | 0.1085 | 1.2258 | (fixed)        | 1.00 | 0.0048 | 0.1 | 1.2258 |
|    | u[122] | H(4)...  | H(30) | 6.6207 | 0.0681 | 1.2277 | (fixed)        | 1.00 | -.1483 | 0.1 | 1.2277 |
|    | u[274] | H(10)... | H(23) | 5.1341 | 0.1087 | 1.2474 | (fixed)        | 1.00 | -.0152 | 0.1 | 1.2474 |
|    | u[423] | H(17)... | H(32) | 6.1657 | 0.1092 | 1.2508 | (fixed)        | 1.00 | 0.1400 | 0.1 | 1.2508 |
|    | u[120] | H(4)...  | H(28) | 5.1040 | 0.1088 | 1.2614 | (fixed)        | 1.00 | -.0388 | 0.1 | 1.2614 |
| 10 | u[177] | H(6)...  | H(28) | 6.0893 | 0.1096 | 1.3029 | (fixed)        | 1.00 | 0.0848 | 0.1 | 1.3029 |
|    | u[390] | H(15)... | H(34) | 2.9302 | 0.1252 | 1.3034 | Tied to u[361] | 1.00 | 0.0714 | 0.2 | 1.1172 |
|    | u[408] | C(16)... | H(34) | 4.6911 | 0.0893 | 1.3279 | Tied to u[28]  | 1.00 | -.0397 | 0.6 | 1.1279 |
|    | u[250] | C(9)...  | H(23) | 4.6796 | 0.0895 | 1.3500 | Tied to u[28]  | 1.00 | -.0396 | 0.6 | 1.1475 |
|    | u[118] | H(4)...  | H(26) | 2.8376 | 0.1267 | 1.3615 | Tied to u[361] | 1.00 | 0.0248 | 0.2 | 1.1672 |
| 15 | u[119] | H(4)...  | C(27) | 4.6442 | 0.0896 | 1.3622 | Tied to u[28]  | 1.00 | -.0685 | 0.6 | 1.1578 |
|    | u[319] | H(12)... | H(23) | 2.8171 | 0.1270 | 1.3701 | Tied to u[361] | 1.00 | 0.0113 | 0.2 | 1.1746 |
